# Supplementary material for: Internet risky behaviours among youth with visual impairment
Source: PeerJ journal article supplement (doi:10.7717/peerj.12376), 2021-11-30
Supplement: internet,_27.01.xlsx [file internet%2C_27.01.xlsx]

## Sheet: Arkusz1
No of participants	code of participant	sex (a-male; b: female)	school (low- secondary/up-secondary)	class level	age	class/low level (1); up-level (2)	a: urban/ b:no urban	dormitor: yes=a; b=no	blind=a; poor-sighted=b	living with 2 parents: a; living only with mother: b; living only with father: c; other family situation: d	number of siblings	Mother education level: a: primary school; b: vocational education; c: secondary education, d: higher education	Fother education level: a: primary school; b: vocational education; c: secondary education, d: higher education	Conversation via the Internet (chats, Skype): (a- never/almost never; b - sometimes; c - never/almaost never	SNS: a- never/almost never; b - sometimes; c - never/almaost never	discussion forums: (a- never/almost never; b - sometimes; c - never/almaost never	MP3, music and software uploading: (a- never/almost never; b - sometimes; c - never/almaost never	e-mails: a- never/almost never; b - sometimes; c - never/almaost never	Searching for information for learning purpose: a- never/almost never; b - sometimes; c - never/almaost never	Online shopping: a- never/almost never; b - sometimes; c - never/almaost never	Blogs: a- never/almost never; b - sometimes; c - never/almaost never	time during school days in min	time during school days in min	use internet at home: yes: t/no: n	use internet at school: yes: t/no: n	use internet at Library : yes: t/no: n	use internet in internet caffee :yes: t/no: n	use internet in the boarding school : yes: t/no: n	use internet in the friend;s home: yes: t/no: n	mobile phone: yes (t)/no (No)	tv: yes (t)/no (No)	the own computer yes (t)/no (No)	computer shared with other members of your family yes (t)/no (No)	console yes (t)/no (No)	Downloading the software illegally without valid license: a- never/almost never; b - sometimes; c - never/almost never	Publication of photos and movies on YouTube without permission of their owners: a- never/almost never; b - sometimes; c - never/almost never	Hacking: a- never/almost never; b - sometimes; c - never/almost never	Communication with persons promoting violence: a- never/almost never; b - sometimes; c - never/almost never	Publication information regarding sex: a- never/almost never; b - sometimes; c - never/almost never	Viewing sexual peages online: a- never/almost never; b - sometimes; c - never/almost never	Gambling online: a- never/almost never; b - sometimes; c - never/almost never	witness: 1- never/almost never; 2 - sometimes; 3 - never/almost never	Victim: 1- never/almost never; 2 - sometimes; 3 - never/almost never	Perpetrator: 1- never/almost never; 2 - sometimes; 3 - never/almost never
1	7b	b	b	3	19.9278	2	a	b	b	a	3	b	b	a	c	a	b	b	c	b	a	60	180	t	t	t	n	n	t	t	n	t	n	n	a	a	a	b	a	a	a	2	2	1
2	22b	b	a	1	13.8667	1	a	b	b	a	1	a	a	a	c	a	c	a	c	a	a	60	60	t	t	t	n	t	n	t	n	n	t	n	b	a	a	a	a	a	a	1	1	1
3	23b	b	a	3	15.8889	1	b	a	b	a	2	b	c	c	c	b	c	b	b	a	a	90	180	t	t	n	n	t	t	t	n	t	t	n	a	a	a	a	a	a	a	2	1	2
4	24b	b	a	3	15.8917	1	b	a	b	a	2	b	c	c	b	a	b	a	b	a	a	90		t	t	n	n	t	n	t	n	t	n	n	b	a	a	a	a	a	a	2	2	2
5	25b	b	b	1	21.8278	2	b	b	b	b	2	a	a	a	a	a	a	a	c	a	a	60	60	t	t	n	n	t	n	t	n	n	t	n	a	a	a	a	a	a	a	1	1	1
6	14b	a	b	3	22.9639	2	a	b	b	a	1	c	c	c	b	b	c	b	b	b	a	60	1380	t	t	t	t	t	t	t	n	t	t	n	b	b	a	a	b	b	a	2	2	2
7	15b	a	b	3	22.6444	2	a	a	b	b	1	b	b	b	c	b	b	b	c	b	a	120	240	t	t	t	n	t	n	t	n	t	n	n	b	a	a	a	a	a	a	2	1	1
8	42b	a	b	2	18.7333	2	a	b	b	a	2	c	b	b	b	a	c	a	b	a	a	60	120	t	n	n	n	t	t	t	t	t	n	n	a	a	a	a	a	a	a	2	1	1
9	41b	b	b	2	21.1528	2	a	b	b	a	1	a	c	a	c	a	a	a	c	a	a	60	180	t	t	n	n	n	n	n	n	t	n	n	a	a	a	a	a	a	a	1	1	1
10	40b	b	b	2	22.3944	2	a	b	b	a	1	c	b	a	b	a	b	a	c	a	a	0	210	t	n	n	n	n	t	t	n	t	t	n	a	a	a	a	a	a	a	1	1	1
11	39b	b	b	1	16.9222	1	a	b	b	b	2	a	a	c	c	b	c	b	c	b	a	300	1440	t	t	t	n	t	t	t	t	t	t	t	a	a	a	a	a	a	a	2	1	1
12	1b	a	b	3	18.6139	2	a	b	b	a	3	b	b	b	c	b	c	c	c	b	a	130	300	t	t	t	t	n	t	t	n	t	t	n	c	b	a	b	a	b	a	2	1	1
13	2b	b	b	3	22.8444	2	b	a	b	a	0	a	a											t	t	t	t	t	n	t	t	t	t	n	a	a	a	a	a	a	a	1	1	1
14	12b	b	b	3	21.8889	2	b	a	b	a	0	b	b	c	c	b	c	a	c	a	a	30	210	t	t	t	n	n	t	n	n	t	t	n	a	a	a	a	a	a	a	1	1	1
15	5b	a	b	3	18.8306	2	a	b	b	d	3		a	c	c	c	c	c	c	c	c	60	240	t	t	n	n	n	t	t	n	n	n	n	a	b	a	b	b	a	a	1	2	2
16	3b	a	b	3	21.4722	2	a	a	b	a	3	a	b	a	c	b	b	c	b	b	b	60	530	t	t	t	t	t	t	t	n	t	n	n	a	a	a	a	b	b	a	2	2	2
17	4b	b	b	3	18.4194	2	b	b	b	a	2	b	b	b	c	b	b	c	c	b	c	60	240	t	t	t	t	t	t	t	n	t	t	n	b	b	a	a	a	a	a	2	2	1
18	19b	a	a	1	15.4056	1	a	b	b	a	1			b	c	a	a	a	b	b	a	60	90	t	n	n	n	n	n	n	t	t	t	t	a	a	a	b	a	a	b	2	2	1
19	18b	a	a	1	14.3611	1	a	a	b	a	0	c	b	b	b	a	b	a	c	a	a	60	90	t	t	n	n	n	n	t	t	t	n	n	a	a	a	a	a	a	a	1	1	1
20	20b	a	a	3	17.1333	1	a	a	b	a	1	d	d	c	c	b	c	b	c	b	b	30	1440	t	t	t	t	t	t	t	n	t	n	t	b	a	b	a	a	a	a	2	2	2
21	21b	a	a	1	14.4444	1	b	b	b		0	c	b	b	c	a	a	a	c	a	a	60	30	t	t	n	n	t	n	t	n	t	t	t		a	a	a	a	a	a	1	1	1
22	33b	b	a	2	17.0056	1	b	a	b	b	2	b	b	c	c	b	b	b	c	b	a	210	330	t	t	t	t	t	t	t	n	t	t	n	a	a	a	a	a	a	a	2	1	1
23	30b	b	a	1	13.9444	1	b	b	b	a	1	c	b	a	c	a	a	a	b	a	b	60	60	t	t	n	n	t	t	t	t	n	t	n	a	a	a	a	a	a	a	2	1	1
24	45b	a	b	3	19.3056	2	a	b	b	b	1	b	c									60	90	t	t	n	n	t	t	t	t	t	n	t	a	a	a	a	a	a	a	1	1	1
25	60b	a	b	3	20.3861	2	a	a	b	a	0	b	a	c	c	b	a	b	c	b	a	1440	1440	t	t	t	t	t	t	t	n	t	t	n	a	b	a	a	b	b	a	2	2	2
26	59b	a	b	1	16.8722	1	b	a	b	c		b	a	a	a	b	b	b	c	a	c	90	90	t	n	n	n	n	t	t	n	t	t	t	a	a	b	c	b	a	c	2	2	1
27	57b	a	b	2	20.2806	2	a	b	b	a	2	c	b									600	120	t	n	n	n	n	n	t	n	t	n	n	b	a	a	a	a	a	a	1	1	1
28	58b	a	b	3	19.1	2	a	a	b	a	2	b	b							a	a	0	180	t	t	t	n	t	n	t	n	n	t	n	a	a	a	a	a	a	a	2	1	1
29	56b	a	b	2	23.4111	2	a	b	b	d	0	c	c	b	c	c	c	c	c	a	b	270	360	t	t	t	t	n	t	t	t	t	t	n	c	b	c	b	c	c	a	2	3	2
30	55b	a	b	2	19.0944	2	a	a	b	b	1	b	c	b	c	b	a	a	b	b	a	0	210	t	n	n	n	n	t	t	t	t	t	t	a	a	a	a	a	a	a	1	1	1
31	53b	a	b	2	22.4361	2	b	a	b	a	3	a	b							a	a	60	90	t	t	t	n	n	n	n	n	t	n	n	a	a	a	a	a	a	a	1	1	1
32	52b	b	b	2	18.875	2	a	b	b	a	1	c	c	b	c	a	c	b	c	a	b	60	180	t	n	n	t	n	n	t	n	n	t	n	a	b	a	b	a	a	b	2	1	1
33	47b	b	b	3	19.8833	2	b	a	b	a	8	c	b	a	c	b	b	a	c	b	a	30	240	t	t	n	n	t	t	t	n	t	t	n	b	a	a	a	a	a	a	2	1	1
34	46b	a	b	3	15.7417	1	b	b	b	a	3	b	c	a	a	a	a	b	b	a	a	30	30	t	t	n	n	n		t	n	t	t	n	b	a	a	a	a	b	a	1	1	1
35	44b	b	b	2	18.1861	2	b	a	b	a	1	b	b	a	a	b	a	b	a	a	a	60	180	t	t	n	n	t	t	t	n	t	t	n	a	a	a	a		a	a	1	1	1
36	43b	b	b	2	21.4	2	a	a	b	a	0	b	c	a	b	a	b	b	b	b	a	30	60	t	n	n	n	n	n	t	n	t	t	n	a	a	a	a	a	a	a	1	1	1
37	34b	a	a	1	20.3639	2	b	a	b	a	1	b		a	c	a	b	c	c	c	c	30	180	t	t	t	t	t	t	t	t	t	t	t	b	b	c	a	a	a	a	1	1	1
38	38b	b	b	1	16.7833	1	a	b	b	a	0	b	b	c	c	a	b	b	c	c	c	240	1320	t	t	t	n	t	t	t	t	t	t	n	a	a	a	a	a	a	a	2	1	1
39	28b	a	b	3	19.3444	2	a	b	b	a		d	d	a	a	b	b	a	c	a	a	60	30	t	t	n	n	n	n	t	t	t	n	n	c	a	c	c	c	a	c	1	1	1
40	11b	a	b	3	19.8333	2	a	a	b	a	3	b	b	b	b	b	b	b	c	c	a	60	90	t	t	t	t	t	t	t	t	t	t	t	a	a	a	a	a	b	a	1	1	1
41	10b	a	b	3	23.0833	2	a	a	b	a	3	a	b	c	c	a	b	a	c	a	a	60	120	t	t	t	t	t	t	n	n	t	t	n	a	b	a	a	a	b	a	2	2	1
42	9b	b	b	3	19.8528	2	a	b	b	a	1	c	c	c	c	b	b	b	b	b	a	180	600	t	t	t	t	t	t	t	n	t	t	n	b	a	a	a	a	a	a	2	1	1
43	31b	b	a	1	13.425	1	a	a	a	a	1	b	b	a	a	a	a	a	b	a	a	30	0	n	n	n	n	n	n	n	n	n	n	n	a	a	a	a	a	a	a	1	1	1
44	8b	b	b	3	18.6028	2	b	a	a	a	1	b	b	c	c	a	a	b	c	b	a	240	300	t	t	t	t	t	t	t	n	t	t	n	b	a	a	a	a	a	a	2	1	1
45	6b	b	b	3	18.7194	2	a	a	a	a	2	b	b	a	a	a	b	a	b	a	a	60	0	n	t	t	n	t	t	t	n	t	n	n	b	a	a	b	a	a	a	2	1	2
46	64b	a	b	1	20.5944	2	a	a	a	a	1	b	b	a	a	a	b	a	b	b	a		30	t	t	n	n	t	n	n	n	n	n	n	b	a	a	a	a	a	a	1	1	1
47	50b	a	b	2	16.6917	1	a	b	a	b	2			c	c	c	c	b	c	b	b	60	60	t	t	t	n	n	t	t	t	t	n	n	a	a	a	a	b	b	a	2	1	1
48	29b	a	b	1	19.6333	2	a	a	a	a	2	c	c	a	b	b	b	a	c	b	a	60	0	t	t	t	n	t	n	t	t	n	n		b	a	a	a	a	a	a	2	1	1
49	49b	a	b	2	18.0389	2	b	a	a	a	2	a	c	c	b	b	c	b	c	a	a		180	t	t	n	n	t	t	t	n	t	t	n	c	a	a	a	a	b	a	1	1	1
50	27b	a	b	1	19.1056	2	a	a	b	a	1	c	c	b	b	b	a	b	a	a	a	0	30	t	t	n	n	t	n	n	n	t	t	n	b	a	a	a	a	a	a	2	1	1
51	29ł	a	a	1	14.3056	1	a	a	b	a	1	c	c									30	60	t	n	n	t	n	t	t	n	t	t	t	b	a	c	a	a	a	a	3	2	1
52	30ł	a	a	1	14.1417	1	b	a	b	a	2	a	a	b	b	a	a	b	b	a	b	0	90	t	t	n	t	t	t	t	n	t	t	t	a	a	a	a	a	a	a	1	1	1
53	12ł	a	a	3	15.9806	1	a	b	b	a	1	c	d	b	c	a	c	b	c	b	b	0	120	t	t	n	t	t	t	t	t	t	t	n	b	a	b	a	a	c	a	2	1	1
54	59ł	b	b	2	17.6944	1	b	a	b	a	1	b	b	c	c	a	b	b	c	b	a	60	90	t	t	n	n	t	n	t	n	t	t	n	b	a	a	a	a	a	a		1	1
55	58ł	b	b	2	19.5778	2	a	b	b	a	1	b	b	b	b	b	a	b	b	a	a	0	30	t	n	n	n	t	t	n	n	t	t	n	a	a	a	a	a	a	a	1	1	1
56	56ł	a	b	2	18.125	2	a	b	b	a	3	b	b	b	b	a	a	c	c	b	a	150	335	t	t	n	n	n	n	t	n	t	t	n	a	a	a	a	a	a	a	2	1	1
57	62ł	b	b	3	18.8444	2	a	b	b	b	1	a	a	b	c	a	c	b	c	b	a	120	180	t	t	t	t	n	t	t	n	t	t	n	b	a	a	a	a	b	a	2	2	1
58	41ł	b	b	2	18.1778	2	a	a	b	a	1	c	c	b	c	a	c	a	c	a	b	600	60	t	t	t	t	t	t	n	n	t	t	n	a	a	a	a	a	b	a	1	1	1
59	40ł	a	b	2	19.2972	2	a	b	b	c	2	b	b	b	a	a	c	c	c	b	b	30	120	t	t	t	t	n	t	t	t	t	t	n	a	a	b	b	a	a	b	2	1	2
60	37ł	b	b	1	17.1917	1	a	b	b	a	0	b	b	b	b	a	a	b	c	a	a	0	60	t	t	t	n	n	n	t	t	t	n	n	b	a	a	a	a	a	a	1	1	1
61	38ł	b	a	2	17.2389	1	a	b	b	d	2			b	c	a	c	b	b	a	a	30	75	t	t	n	t	t	t	t	n	n	n	n	a	a	a	a	a	a	a	2	1	1
62	46ł	a	b	3	18.7139	2	a	b	b	b	1	c		a	c	c	c	a	b	a	a	60	120	t	t	n	n	n	t	t	n	n	t	n	a	a	a	a	a	a	a	1	1	1
63	43ł	b	b	2	19.1417	2	b	b	b	a				a	a	a	b	a	b	a	a	30	60	t	t	n	n	t	n	n	n	t	t	n	a	a	a	a	a	a	a	1	1	1
64	45ł	b	b	3	19.075	2	b	a	b	a	4	b	b		b	a	b	b	c	a	a	30	120	n	t	n	n	t	t	t	t	n	n	n	b	a	a	a	a	a	a	1	1	1
65	44ł	a	b	3	18.7194	2	a	b	b	a	2	b	a	c	c	c	b	c	c	b	b	240	180	t	n	n	n	n	n	t	n	t	t	n	b	a	a	a	a	a	a	1	1	1
66	39ł	b	a	3	16.3972	1	a	b	a	d	1	b		b	b	b	b	c	c	b	b	60	60	t	n	n	n	n	n	t	n	t	t	n	a	a	a	a	a	a	a	2	1	1
67	32ł	b	b	2	18.9694	2	a	b	b	d	0	b		c	c	b	b	a	b	a	a	30	180	t	n	n	t	t	n	t	n	n	t	n	a	a	a	a	a	a	a	1	1	1
68	33ł	b	b	2	18.9806	2	b	b	b	a	3	b	b	b	c	b	b	b	b	b	a	60	180	t	t	n	t	t	t	t	t	t	t	n		a	a	a	a	a	a	2	1	1
69	31ł	b	a	1	18.1611	2	a	b	b	d	5	b	c	a	c	b	b	a	c	b	a	300	1440	n	t	t	t	t	t	t	n	t	t	n	a	a	a	b	a	a	a	2	2	1
70	64ł	b	a	2	15.1111	1	a	a	b	b	1	b	b	b	a	a	c	b	c	a	a	20	120	t	t	n	t	n	t	t	n	t	t	n	a	a	a	a	a	a	a	1	1	1
71	63ł	b	a	2	16.025	1	b	a	b	a	1			b	b	a	b	a	a	a	a	60	30	t	t	n	n	n	n	t	n	n	t	n	a	c	a	a	a	a	a	1	1	1
72	73ł	a	b	1	18.4222	2	b	a	b	c	1	c	c	c	c	a	b	a	a	a	a	30	90	t	t	t	n	t	t	t	n	n	n	t	a	a	a	a	a	a	a	2	2	1
73	72ł	b	b	1	18.7722	2	a	b	b	d	1	a	a	c	c	a	c	b	c	b	b	120	120	t	t	n	n	n	t	t	n	t	n	n	a	a	a	a	a	a	a	2	1	1
74	70ł	b	b	1	17.1639	1	b	a	b	a	4	b	b	a	b	a	b	a	b	a	a	30	30	n	t	t	t	t	t	t	n	n	n	n	a	a	a	a	a	a	a	2	1	1
75	68ł	a	b	1	17.6417	1	b	b	b	a	0	b	b	a	b	b	c	b	c	a	a	60	90	t	t	t	t	n	t	t	n	t	t	t	a	a	a	b	a	a	a	1	1	1
76	65ł	b	a	2	14.3944	1	a	b	b	b	1	a		c	b	a	b	b	b	a	a	30	180	t	t	n	t	n	t	t	t	t	n	n	a	a	a	a	a	a	a	2	1	1
77	66ł	b	a	2	14.5556	1	a	b	b	b	0		c	a	a	c	b	a	b	a	b			t	t	t	n	n	n	n	n		n	n		a	a	a	a	a	a	1	1	1
78	69ł	a	b	1	21.8944	2	a	b	b	b		b	a	b	c	b	c	c	c	b	c	30	240	t	t	t	n	n	t	t	n	t	t	n	c	a	a	a	a	a	a	1	1	1
79	71ł	b	b	1	19.0694	2	b	a	b	c	4	b	b	b	c	a	b	b	b	a	a	0	105	t	t	n	t	t	n	t	n	t	t	n	b	a	a	a	a	a	a	1	1	1
80	74ł	a	b	1	16.9833	1	a	a	b	a	3	b	b	b	b	a	c	b	a	a	a	180	180	t	t	t	t	t	t	t	n	t	t	n	c	a	b	a	a	a	a		1	1
81	67ł	a	a	2	19.2694	2	b	a	b	a	3	b	a	b	c	a	c	a	c	a	a	0	510	t	t	t	t	t	t	t	t	t	n	n	c	a	a	a	a	a	a	2	1	1
82	51ł	a	b	2	17.8861	1	b	a	b	a	1			a	a	a	a	a	b	a	a	20	30	t	t	n	t	n	n	n	n	n	t	n	a	a	a	a	a	a	a	1	1	1
83	52ł	a	b	2	18.3361	2	b	a	b	a	1	b	b	a	b	a	a	b	b	a	a	60	30	t	t	n	n	t	n	t	n	t	n	n	a	a	a	a	a	a	a	1	1	1
84	54ł	b	b	2	19.1139	2	a	b	b	a	0			a	b	a	c	a	b	a	a	30	30	t	n	t	n	n	n	t	n	t	t	n	a	a	a	a	a	a	a	1	1	1
85	53ł	a	b	2	17.6528	1	b	a	b	a	1	c	c	b	c	a	c	b	c	a	b	90	120	t	t	t	t	t	t	t	t	t	n	n	b	a	a	a	a	a	a	2	2	1
86	55ł	b	b	2	22.0944	2	a	a	b	b	0	b	b	c	c	b	c	a	b	b	c	90	360	t	t	t	t	t	t	t	t	t	n	n	b	a	a	a	a	b	a	2	1	1
87	61ł	a	b	3	19.2667	2	a	b	b	b	1	b	b	b	c	b	c	a	b	a	a	30	60	t	t	t	t	n	t	t	n	t	t	t	a	b	b	a	a	b	a	2	1	2
88	60ł	b	b	3	19.0528	2	b	a	b	a	5	b	b	c	c	a	b	b	b	a	a	60	90	t	t	n	n	t	t	t	n	t	t	n	b	a	a	a	a	a	a	1	1	1
89	7ł	a	b	4	21.875	2	a	a	b	b	0	c	b	b	b	a	a	b	a	a	a	120	180	t	t	t	t	t	t	t	t	t	t	t	a	a	a	a	a	a	a		3	1
90	8ł	a	b	4	20.0861	2	b	a	b	a	3	a	b	b	b	a	a	c	c	b	a	60	120	t	t	t	t	t	t	n	n	t	t	n	b	a	a	a	a	b	a	2	1	1
91	9ł	a	b	4	19.9778	2	a	a	b	b	3	b	b	c	b	b	c	b	c	c	a	90	90	t	t	t	t	t	t	n	n	t	t	n	c	a	a	a	a	b	a	2	1	2
92	10ł	a	a	3	17.2917	1	a	b	a	a	1	a	a	c	b	c	c	c	b	a	a	90	150	t	t	n	t	n	t	t	n	t	n	n	c	a	b	a	a	b	a	2	2	1
93	11ł	b	a	3	16.325	1	a	b	b	d	4	b	b	c	c	b	b	a	c	a	a	60	300	t	t	t	t	t	t	t	n	t	t	n	a	a	a	a	a	a	a	2	1	1
94	13ł	b	b	2	18.2333	2	b	a	b	a	1	b	b	c	c	b	c	b	c	b	a	90	180	t	t	t	t	t	t	t	n	t	t	n	a	a	a	a	a	a	a	2	1	1
95	14ł	b	b	2	19.1833	2	b	b	b	a	3	c	c	c	c	c	b	b	c	b	c	60	180	t	n	t	t	n	t	t	n	t	t	n	a	b	a	a	a	a	a	1	1	1
96	15ł	a	b	2	18.4639	2	b	a	b	d	2	c	c	c	c	c	c	c	c	c	c	420	300	t	t	t	t	t	t	t	t	t	t	t	a	a	a	a	c	c	a	1	1	1
97	16ł	b	a	3	17.7556	1	a	b	b	b	2	c	b	c	c	a	b	b	c	a	a	60	120	t	t	n	n	n	t	t	n	t	t	n	a	a	a	a	a	a	a	1	1	1
98	17ł	a	a	3	16.6139	1	a	b	b	a	3	b	b	b	b	a	c	a	c	b	a	60	150	t	t	n	t	t	t	t	n	t	t	n	b	a	a	a	a	b	a	1	1	1
99	18ł	a	a	3	16.8556	1	a	a	b	a	2	c	c	a	b	c	c	b	c	a	c	60	90	t	t	t	t	t	n	t	t	t	t	n	b	a	c	a	a	a	b	1	1	1
100	19ł	b	a	3	15.5389	1	a	b	b	a	0	c	c	b	b	a	c	a	c	b	b	60	90	t	t	t	t	t	n	t	t	t	t	n	a	a	a	a	a	a	a	1	1	1
101	20ł	a	a	3	15.5944	1	a	a	b	a	1	b	b	b	b	a	b	a	b	a	a	100	60	t	t	n	n	t	n	t	n	t	n	n	b	a	a	a	a	b	a	2	1	1
102	21ł	b	a	3	15.6667	1	b	a	b	a	2	b	c	b	b	a	a	b	b	a	b	0	60	t	t	t	t	t	t	t	n	t	t	n	a	a	a	a	a	a	a	2	2	1
103	22ł	a	b	4	22.1944	2	a	b	a	d	1	c	c	c	c	c	c	c	c	c	c	300	1380	t	t	t	t	t	t	t	t	t	t	t	c	c	c	c	c	c	c	3	1	3
104	24ł	b	b	2	18.0222	2	a	a	b	a	5	b	b	c	c	a	c	c	c	c	a	90	120	t	t	t	t	t	t	t	t	t	t	n	a	b	a	a	a	a	a	1	1	1
105	25ł	a	b	2	18.5639	2	b	a	b	a	0	b	b	c	b	a	b	a	a	a	a	0	900	t	t	t	t	t	t	n	t	t	t	n	c	a	a	a	a	a	a	3	2	1
106	26ł	b	b	2	17.6889	1	a	b	b	b	1	b	b	c	c	a	b	b	b	a	a	90	180	t	t	t	t	t	t	t	t	n	t	n	a	a	a	a	a	a	a	2	1	1
107	27ł	a	a	1	15.5361	1	a	b	b	a		c	b	c	c	c	c	c	a	c	c		90	t	t	t	t	t	t	t	t	t	t	t	a	a	a	a	a	a	a	3	2	1
108	28ł	a	a	1	14.6889	1	a	b	b	a	1	c	c	c	b	a	c	a	b	b	a	480	780	t	t	n	n	t	t	t	n	t	t	t
109	1ł	a	b	4	19.9917	2	a	b	b	a	1	b	b									30	120	t	t	n	n	n	t	t	t	t	t	n	c	a	a	a	a	c	a	2	1	1
110	2ł	a	b	4	23.2528	2	a	a	b	a	1	b	b	c	c	a	c	c	b	b	a	120	180	t	t	t	t	t	t	t	t	t	t	t	b	a	a	b	a	b	a	3	1	1
111	4ł	b	b	4	19.9389	2	a	b	b	a	0	b	b	a	c	a	a	a	c	a	a	30	90	t	t	t	t	t	t	t	t	t	t	n	a	a	a	a	a	a	a	1	1	2
112	3ł	b	b	4	19.9361	2	a	a	b	b	1	b	b	b	b	b	b	b	b	b	b	30	30	t	t	t	t	t	t	t	n	t	t	n	b	a	a	a	a	a	a	2	1	1
113	5ł	a	b	4	20.2194	2	a	b	b	a	2	b	b	b	a	a	a	b	b	a	a	180	90	t	t	t	t	n	t	t	n	t	t	n	a	a	a	a	a	a	a	1	1	1
114	6ł	a	b	4	20.7278	2	a	b	a	b	2	b	b	c	c	a	c	c	c	b	a	90	330	t	t	t	n	t	t	t	n	t	t	n	c	a	b	a	a	a	a	1	1	1
115	34ł	a	a	1	14.1639	1	a	b	a	a	1	c	b	b	b	b	b	b	b			0	160	t	n	n	n	n	t	t	n	t	n	n	a	a	a	a	a	a	a	1	1	1
116	57ł	b	b	2	17.7667	1	b	a	a	a	1	b	b	b	c	a	b	a	c	a	a	60	120	t	t	n	t	t	t	t	n	t	t	n	a	a	a	a	a	a	a	1	1	1
117	145k	b	b	1	17.1861	1	a	b	b	a	1	b	c	c	c	c	c	c	c	c	c	90	240												a	a	a	a	a	a	a	1	1	2
118	144k	a	b	1	16.775	1	a	b	b	b	0	b	b	c	c	a	b	b	b	b	a	90	300	t	t	n	n	n	t	t	n	t	t	n	b	a	a	a	a	a	a	1	1	1
119	143k	b	b	1	17.6222	1	b	a	b	a	2	b	b	b	c	b	b	c	b	a	c	30	480	t	t	n	n	t	n	t	n	t	t	n	a	a	a	a	a	a	a	1	1	1
120	142k	a	b	1	16.8833	1	b	a	b	a	3	b	b	b	b	b	c	c	b	b	c	0	180	t	t	t	t	t	t	t	n	t	n	n	a	a	a	a	a	a	a	2	1	1
121	140k	b	b	1	19.9444	2	a	b	b	a	1	b	b	b	b	a	c	b	c	b	b	30	60	t	t	n	n	n	n	n	n	t	t	n	a	a	a	a	a	a	a	2	1	1
122	137k	a	b	2	17.5361	1	a	a	b	d	3	c	c	c	c	c	a	c	c	b	c	90	150	t	t	t	t	t	n	t	n	t	t	n	a	a	a	a	a	a	a	1	2	1
123	136k	b	b	2	20.7583	2	b	b	b	b	1	b	b	c	c	b	c	c	c	a	a	600	100	t	t	t	t	t	t	t	t	t	t	n	b	a	b	b	a	b	a	3	2	1
124	135k	b	b	2	18.375	2	a	b	b	a	1	b	b	c	c	b	c	c	c	b	a	240	300	t	t	n	n	t	t	t	t	t	t	t	b	a	a	a	a	a	a	2	2	2
125	134k	a	b	2	18.3083	2	b	a	a	a	1	c	b	c	c	b	b	c	c	a	b	180	600	t	t	t	t	t	t	t	n	t	n	n	b	a	b	a	a	b	a	2	1	1
126	158L	a	b	2	23.3306	2	a	a	b	a	2	b	b	a	a	a	a	a	a	a	a	30	30	t	t	t	t	t	t	n	n	t	t	n	a	a	a	a	a	a	a	1	1	1
127	157k	b	b	3	18.5444	2	b	a	b	a	1	c	c	c	c	a	b	b	c	a	b	60	120	t	t	t	t	t	t	t	n	t	t	n	b	a	a	a	a	a	a	1	1	1
128	156k	b	b	3	19.1556	2	a	a	b	a	2	c	c	b	b	b	a	c	b	a	a	30	75	t	t	n	n	t	t	t	n	t	t	n	a	a	a	a	a	a	a	1	1	1
129	155k	b	b	3	19.7333	2	b	b	b	a	3	b	b	b	a	a	b	b	b	a	c	180	300	t	n	n	t	n	n	t	n	t	t	n	a	a	a	a	a	a	a	1	1	1
130	122k	b	b	3	18.4361	2	b	a	a	a	1	b	b	b	a	a	b	a	c	a	a	30	60	t	t	n	n	t	n	t	n	t	n	n	b	a	a	a	a	a	a	2	1	1
131	123k	a	b	3	19.9944	2	b	a	a	a	1	b	b	b	c	b	b	c	c	a	a	60	240	t	t	n	n	t	n	t	n	t	n	n	b	a	a	a	a	a	a	2	2	1
132	124k	b	b	3	18.9806	2	b	a	b	a	1			b	c	a	b	b	b	a	a	90	150	t	t	t	n	t	n	t	n	t	n	n	a	a	a	a	a	a	a	1	1	1
133	125k	a	b	3	20.0722	2	a	a	b	a	2	b	b	a	a	a	b	a	b	a	a	0	30	t	t	t	n	t	n	n	n	t	t	n	a	a	a	a	a	a	a	1	1	1
134	133k	a	b	2	18.1639	2	a	a	a	a	1	c	b	c	b	a	c	c	b	b	b	240	420	t	t	t	t	t	t	n	n	t	n	n	c	a	b	a	a	a	a	2	1	1
135	131k	b	b	2	18.225	2	b	a	b	a	0	b	b	c	c	b	c	a	c	a	c	60	120	t	t	n	n	t	t	t	n	t	t	n	a	a	a	a	a	a	a	2	1	1
136	130k	b	b	2	19.3111	2	a	b	b	c	1	b	b	b	c	a	b	b	c	b	a	60	300	t	t	n	n	n	t	t	n	t	t	n	b	a	a	a	a	a	a	2	1	1
137	129k	b	b	2	17.525	1	b	a	b	a	1	b	b	b	b	a	a	b	c	b	a	30	30	t	t	t	t	t	t	t	t	t	t	t	a	a	a	a	a	a	a	2	1	1
138	128k	b	b	2	22.8889	2	b	a	b					b	b	a	a	c	c	b	a	390	240	t	t	t	n	t	t	t	t	t	n	t	b	a	a	a	a	a	a	2	1	1
139	127k	b	b	2	18.0194	2	a	a	b	a	1	b	b	b	c	a	a	b	c	a	a	0	300	t	n	n	n	t	n	t	t	t	n	n	a	a	a	a	a	a	a	1	1	1
140	126k	a	b	3	18.5278	2	a	a	a	b	3	c	b	b	c	b	b	b	b	a	b	90	165	t	t	t	n	t	n	n	n	t	n	n	a	a	a	a	a	a	a	2	1	1
141	102k	b	b	1	20.4472	2	b	a	b	a	1	b	b	b	c	a	b	c	a	b	a	0	180	t	t	n	n	t	n	t	n	t	t	n	a	a	a	a	a	a	a	2	1	1
142	104k	a	b	1	21.2833	2	b	a	b	a	2	b	b	a	b	a	b	b	b	a	a	300	90	t	t	t	n	t	t	n	n	t	t	n	b	a	a	a	a	a	a	1	1	1
143	105k	a	b	1	22.8194	2	b	a	b	a	3	b	b	b	c	a	b	b	b	a	a	300	600	t	t	t	n	t	t	t	n	t	t	n	b	a	a	a	a	a	a	1	1	1
144	106k	a	b	1	16.9222	1	a	a	a	a	1	c	c	b	b	c	c	b	c	a	b	0	180	t	t	t	t	t	t	t	n	t	n	n	b	a	b	a	a	a	a	1	1	1
145	107k	b	b	1	16.9222	1	a	a	b	b	3	b	b	b	b	b	c	b	c	b	a	0	150	t	t	t	t	t	t	t	n	t	n	n	b	a	a	a	a	a	a	1	1	1
146	108k	b	b	1	17.0667	1	a	a	b	a	4	b	c		b	b	b	b	b	b	b	0	240	t	t	t	n	t	t	t	n	t	n	t	a							2	3	1
147	109k	b	b	1	16.7972	1	b	a	a	a	1	b	b	a	b	a	c	c	c	b	a	180	120	t	t	t	n	t	t	t	n	t	n	n	b	a	a	a	a	a	a	1	1	1
148	110k	a	b	1	17.2222	1	a	b	a	a	1	c	b	b	a	a	b	b	c	a	a	120	60	t	t	t	n	n	t	n	n	n	t	n	a	a	a	a	a	a	a	1	1	1
149	111k	a	b	1	16.5639	1	b	a	b	a	0	b	b	b	c	a	c	b	c	a	a	30	120	t	t	t	t	t	t	t	n	t	t	n	a	a	a	a	a	a	a	1	2	1
150	112k	b	b	1	17.7861	1	a	b	b	a	2	b	b	b	c	a	b	a	b	b	a	60	120	t	t	t	t	t	t	t	t	t	t	n	a	a	a	a	a	a	a	2	1	1
151	113k	b	b	1	16.5944	1	b	a	b	a	2	c	c	a	b	a	c	a	c	a	a	0	120	t	t	t	t	t	n	t	n	t	t	n	a	a	a	a	a	a	a	2	1	1
152	114k	b	b	1	18.1333	2	b	a	b	c	1	a	b	b	c	a	b	b	c	b	a	30	150	t	t	t	t	t	t	n	n	t	t	n	a	a	a	a	a	a	a	2	1	1
153	115k	a	b	3	19.1667	2	a	a	a	a	1	b	b	c	c	b	b	b	b	a	c	360	600	t	t	n	n	t	t	t	n	t	n	n	c	a	a	a	a	a	a	1	1	1
154	118k	a	b	1	21.0722	2	b	b	b	a	2	b	b	b	b	b	c	c	c	c	a	60	90	t	t	n	t	t	t	t	n	t	n	n	a	a	a	a	a	a	b	2	1	1
155	119k	a	b	3	19.0861	2	a	b	b	a	2	b	c	b	b	b	b	c	c	a	a	90	30	t	t	t	t	t	t	t	n	t	n	n	a	a	a	a	a	a	a	2	1	1
156	120k	a	b	3	18.8528	2	a	a	b	a	0	c	b	b	c	a	b	a	b	a	a	90	90	t	t	t	t	t	t	t	n	t	n	n	a	a	a	a	a	a	a	1	1	1
157	121k	b	b	1	21.7611	2	a	a	a	a	4	c	b	b	b	a	c	c	c	a	a	180	120	n	t	t	n	t	t	t	n	t	n	n	a	a	a	a	a	a	a	1	1	1
158	1k	b	a	2	14.4361	1	b	b	b	a	1	b	b	b	b	a	b	a	b	a	a	60	120	t	t		n	t	t	t	n	t	t	n	a	a	a	a	a	a	a	1	1	1
159	18k	b	a	3	15.5861	1	a	b	b	a	1	c	c	c	c	b	b	c	b	c	b	300	300	t	t	t	t	t	t	t	t	t	t	t	a	a	a	a	a	a	a	2	1	1
160	19k	b	a	3	16.3861	1	a	b	b	b	0	b		c	c	c	a	c	a	b	a	240	720	t	n	n	t	t	t	t	n	t	t	n	a	a	b	a	a	a	a	3	2	1
161	17K	a	a	3	15.7194	1	a	b	b	a	1	c	c	c	a	c	c	b	b	c	a	240	600	t	t	n	n	t	t	t	t	t	n	t	c	a	c	c	a	b	a	2	1	2
162	15k	b	a	3	15.9194	1	b	a	b	a	1	b	b	a	b	a	c	b	b	a	b	0	90	t	t	n	t	t	t	t	n	t	t	n	a	a	a	a	a	a	a	2	1	1
163	14k	a	a	3	16.2861	1	b	a	b	b	2	a	a	b	b	a	c	a	b	a	b	30	30	t	t	t	n	t	t	t	n	t	t	n	a	a	a	a	a	a	a	1	1	1
164	12k	a	a	1	13.5278	1	b	a	b	a	5	b	b	c	c	c	c	b	b	a	c	0	240	t	t	n	n	t	t	t	n	n	t	t	a	a	a	a	a	a	a	2	1	2
165	10k	b	a	1	14.0139	1	b	b	b	a	0	b	b	a	b	a	b	a	c	a	a	30	60	t	t	n	n	n	t	t	n	t	n	n	a	a	a	a	a	a	a	2	1	1
166	9k	a	a	3	17.6	1	b	a	b	a	3	b	b	b	b	b	b	b	c	a	a	45	150	t	t	n	n	t	n	n	n	t	t	n	a	a	a	a	a	a	a	2	1	1
167	8k	a	a	2	15.8833	1	a	b	b	b	0	c		c	c	b	c	c	c	a	b	0	300	t	t	t	n	t	n	t	t	t	n	t	a	a	a	a	a	a		1	1	1
168	7k	a	a	3	14.8	1	a	b	b	a	3	c	c	c	c	b	a	c	c	a	b	60	90	t	t	t	t	t	t	t	n	t	t	t	b	a	a	a	a	a	a	1	1	1
169	6k	a	a	2	14.65	1	b	a	b	a	2	b	a	b	b	b	b	a	b	b	b	30	75	t	t	t	n	t	t	t	t		t		a	a	a	a	a	a	b	1	1	1
170	5k	b	a	2	15.375	1	a	a	b	c	2	a	c	c	c	a	b	b	b	b	c	120	360	t	t	n	n	t	t	t	n	n	t	n	a	a	a	a	a	a	a	2	1	1
171	4k	a	a	2	14.8472	1	a	a	b	b	0	b	b	c	c	b	c	b	c	a	a	60	90	t	t	n	t	t	t	t	t	t	t	t	b	a	b	a	a	a	a	2	1	2
172	3k	a	a	2	14.575	1	b	a	b	a	2	b	b	a	a	a	b	a	b	a	b	60	90	t	t	n	t	t	t	t	n	t	t	n	a	a	a	a	a	a	a	1	1	1
173	101k	b	b	1	22.7833	2	b	a	b	b	3	b	b	b	c	a	b	c	a	b	a	0	180	t	t	n	n	t	n	t	n	t	n	n	a	a	a	a	a	a	a	1	1	1
174	159k	b	b	3	19.5083	2	a	a	b	a	1	c	c	c	a	a	b	b	c	a	a	60	120	t	t	t	n	t	t	n	t	t	n	n	b	a	a	a	a	a	a	1	1	1
175	160k	b	b	2	19.275	2	b	a	b	a	1	b	b	c	c	b	c	b	c	b	a	300	720	t	t	t	t	t	t	t	n	t	t	t	b	a	a	a	a	a	a	1	1	1
176	162k	a	b	1	22.7444	2	a	a	a	a	1	c	b	b	a	a	c	c	c	a	a	180	300	t	t	t	t	t	t	t	n	t	t	n	b	a	a	a	a	a	a	2	1	1
177	167k	a	b	1	22.1611	2	a	a	a	a	2	b	b	c	c	b	c	b	a	c	a	420	420	t	t	t	t	t	t	t	n	t	n	n	c	a	c	a	a	a	a	3	2	1
178	166k	a	b	1	20.6667	2	a	b	b	a	3	b	b									60	180	t	t	n	n	n	n	t	n	t	t	n	a	a	a	a	a	a	a	1	1	1
179	165k	b	b	1	16.3722	1	a	a	b	b	2	b	c	b	a	a	c	c	c	b	a	0	120	t	t	n	t	t	t	t	n	t	n	n	b	b	a	a	b	b	a	2	1	1
180	164k	b	b	1	20.8333	2	b	a	b	a	2	b	b	c	c	b	b	b	c	a	c	30	120	t	t	n	t	t	n	t	n	t	t	n	a	a	a	a	a	a	a	2	1	1
181	163k	a	b	2	17.9556	1	b	a	b	a	1	b	b	c	c	b	b	b	c	a	a	60	180	t	t	t	t	t	n	t	n	t	t	n	b	a	a	a	a	b	a	1	2	1
182	161k	a	b	3	19.1778	2	a	b	b	a	1	b	b	a	a	a	a	b	c	a	a	60	60	t	t	t	t	t	t	n	n	n	n	n	a	a	a	a	a	a	a	1	1	1
183	149k	b	b	4	20.7944	2	b	a	b	a	3	a	a	a	c	a	b	c	b	a	a	30	120	t	t	t	n	t	t	n	n	t	t	n	a	a	a	a	a	a	a	2	1	1
184	150k	b	b	4	20.0139	2	b	a	b	a	3	b	a	c	c	b	a	c	b	b	a	60	180	t	t	t	t	t	t	t	n	t	n	n	a	a	a	a	a	a	a	1	1	1
185	153k	a	b	4	20.0528	2	a	b	b	a	1	b	b	b	b	b	b	b	b	b	b	60	60	n	t	n	t	n	t
186	146k	a	b	4	19.6194	2	a	a	a	a	0	b	b	c	a	a	c	b	b	c	a	30	60	t	t	t	t	n	n	n	n	t	t	n	c	a	b	a	a	b	a	2	1	1
187	148K	a	b	4	20.2333	2	b	a	a	a	2	b	a	b	c	a	a	b	c	a	a	180	0	t	t	n	t	t	n	t	n	t	n	n	b	a	a	a	a	a	a	1	1	1
188	132k	a	b	4	20.0194	2	b	a	a	d	1	a	b	a	a	a	b	c	c	a	a	30	0	t	n	n	n	n	t	n	n	t	t	n	b	b	a	a	b	a	a	1	1	1
189	152k	a	a	1	13.7444	1	b	a	a	a	1	b	b	b	b	a	b	a	a	a	a	60	180	t	t	n	n	t	n	t	n	t	t	n	a	a	a	a	a	a	a	1	1	1
190	147k	b	b	4	21.3278	2	a	a	a	a	1	a	a	b	c	a	c	c	c	a	a	480	600	n	t	t	t	t	t	t	n	t	n	n	a	a	a	a	a	a	a	1	1	1
191	151k	a	b	4	20.3639	2	b	a	a	a	2	b	b	b	a	c	c	c	c	b	a	30	90	t	t	t	n	t	n	n	n	t	n	n	a	a	a	a	a	a	a	1	1	1
192	168k	a	a	3	16.2167	1	a	a	b	a	2	c	c	b	b	a	a	b	b	a	a	300	30	t	t	n	n	n	t	n	n	t	t	n	a	a	a	a	a	a	a	3	1	1
193	154k	a	b	4	19.0417	2	b	a	b	a	1	b	b	b	a	a	b	b	b	a	a	30	30	t	t	n	t	t	t	t	n	t	t	n	b	a	a	a	a	b	a	1	1	1
194	1dg	b	b	1	18	2	a	a	b	a	1	a	b	c	c	a	a	c	a	a	a	0	90	t	t	n	n	t	t	t	n	t	t	n	a	a	a	a	a	a	a	2	1	1
195	2dg	a	b	1	17.8556	1	a	b	b	b		c	c	b	c	b	c	b	b	b	b	300	60	t	n	t	n	t	n	t	n	n	n	n	a	a	b	b	a	a	a	2	2	2
196	3dg	a	b	1	18.4722	2	a	b	b	a	5	a	a	c	c	b	b	c	c	a	a	150	240	t	n	n	n	n	n	t	n	t	n	n	a	a	a	a	a	a	a	2	1	1
197	4dg	a	b	1	19.1083	2	a	b	b	c	1	a	a	a	b	a	b	a	b	a	a			t	n	t	n	t	t	t	t	t	n	n	a	b	b	a	c		b	2	2	3
198	5dg	a	b	1	21.6306	2	a	a	a	d	1	a	d	c	c	c	c	c	b	a	c	60	90	t	t	t	n	t	t	n	n	t	t	n	a	a	a	a	a	a	a	2	1	1
199	6dg	a	b	1	17.5306	1	a	b	b	d	1	b	c	a	a	b	b	a	c	a	a	90	120	t	n	t	n	n	t	t	t	t	n	n	a	a	a	a	a	a	a	1	1	1
200	7dg	b	b	1	18.2389	2	a	a	b	b	5	b	a	b	c	c	c	a	c	b	a	60	180	t	t	n	n	t	t	t	t	t	n	t	a	a	a	a	a	a	a	1	2	1
201	8dg	b	b	1	17.275	1	a	b	b	b	0	c	c		b	a	b	b	c	a	a	20	90	t	n	n	n	n	n	t	n	t	n	t	a	a	a	a	a	a	a	1	1	1
202	9dg	b	b	1	19.4222	2	b	b	b	a	1	c	b	a	b	a	b	a	b	a	a	30	60	t	n	n	n	n	n	t	t	n	t	n	a	b	a	a	a	a	a	1	1	1
203	10dg	b	b	1	19.4222	2	a	b	b	a	1	b	c									300	600	t	t	n	n	n	n	t	t	t	t	n	b	b	a	a	a	a	a	1	2	1
204	11dg	b	b	3	18.5194	2	a	b	b	b	1	d	d	c	c	b	b	b	c	b	b	60	150	t	n	t	n	n	t	t	n	t	n	n	a	a	a	a	a	a	a	2	2	1
205	12dg	b	b	3	19.7611	2	b	a	b	a	1			a	b	b	a	b	c	b	b	30	60	t	n	n	n	t	n	n	n	t	t	n	a	a	a	a	a	a	a	1	1	1
206	13dg	a	b	3	19.0972	2	a	b	a	b	1	b	b	a	a	a	a	a	c	a	a	90		t	n	n	n	n	n	t	n	t	n	n	a	a	a	a	c	c	c	1	1	1
207	14dg	b	b	3	16.5722	1	a	a	b	a	2	b	a	a	c	a	c	c	c	a	a	30	90	t	t	n	n	t	n	t	t	n	t	n								1	1	1
208	15dg	b	b	3	21.1528	2	a	a	b	c	2		b									60	60	t	t	n	n	t	n	t	n	t	t	n	a	a	a	a	a	a	a	2	1	1
209	16dg	a	b	1	20.2972	2	a	a	b	a	1	a	a	c	a	a	a	a	b	b	a	30	90	t	t	t	n	t	t	t	n	t	t	n		a	a	b	a	a	a	1	1	1
210	17dg	a	b	3	21.225	2	b	a	b	a	1	b	c	c	b	b	b	b	c	b	b	0	120	t	t	n	n	t	t	t	t	t	t	n	a	a	b	a	a	b	a	2	1	1
211	18dg	b	b	2	20.3583	2	a	a	b	d	2			b	c	b	b	b	b	a	a	60	90	t	t	n	n	t	t	t	n	t	t	n	a	a	a	a	a	a	a	2	1	1
212	20dg	b	a	1	16.1861	1	a	b	b	b	2	c	c							a	a	90	60	t	n	n	n	n	t	t	t	t	n	n								1	1	1
213	21dg	b	a	1	13.5556	1	a	a	b	d	4			c	c	a	c	c	a	a	b	90	90	t	t	n	n	t	t	t	n	t	t	t	a	a	a	a	c	b	b	1	1	1
214	22dg	b	a	1	15.9056	1	a	b	b	a	0	a	a	a	a	a	b	c	c	c	b			t	t	t	n	t	n	t	t	n	t	n	b	b	b	b	b	b	b	1	1	1
215	23dg	b	a	1	14.2194	1	a	a	b	a	5	c	c	b	b	b	b	b	b	b	a	30	60	t	t	t	t	t	t	t	t	t	t	t	a	a	a	b	a	a	b	2	2	3
216	24dg	b	a	3	16.1278	1	b	a	a	a	4	a	a	a	c	a	b	a	b	a	a		60	t	n	t	n	n	n	t	n	t	n	n	b	a	a	a	a	a	a	1	1	1
217	25dg	a	a	3	16.3722	1	a	b	b	a	1	c	b		c	c	c	b	b	a	b	60	480	t	t	n	n	n	t	t	t	t	n	t	c	c	b	c	c	b	a	1	3	2
218	26dg	a	b	3	18.6583	2	a	a	b	b				b	c	a	b	b	b	a	a	0	90	t	n	t	t	n	t	t	t	t	n	t	b	a	b	b	b	a	b	1	1	1
219	27dg	a	b	3	18.7889	2	b	b	b	a	0	b	b	a	a	a	c	b	c	c	b	60	240	t	t	t	t	t	t	t	n	t	t	t	a	a	a	a	a	a	a	1	2	1
220	28dg	b	b	3	18.7	2	a	a	b					b	b	a	b	a	a	a	a	0	30	t	n	n	t	n	t	t	n	t	t	n	b	a	a	a	a	a	b	1	1	1
221	29dg	a	b	3	18.9028	2	a	b	b	a	2	b	b	a	b	b	b	b	b	b	a	0	90	t	t	t	t	t	t	t	n	t	t	n	a	a	a	a	a	a	a	2	1	1
222	30dg	a	b	3	19.2389	2	a	a	a	a	2	b	b	b	a	a	b	a	b	b	a	0	60	t	t	t	n	t	t	t	t	t	t	n	b	a	a	a	a	a	a	1	1	1
223	31dg	a	b	3	19.2722	2	a	a	b	d	1	b	b	a	b	a	c	b	b	b	a	90	180	t	n	n	n	t	t	t	t	t	t	t	c	a	a	a	a	a	a	2	2	2
224	32dg	b	b	3	19.375	2	a	b	b	a	5	a	b	c	b	a	b	b	b	a	b	0	180	t	t	t	n	t	t	t	n	n	t	n	a	a	a	a	a	a	a		1	1
225	33dg	b	b	3	18.7722	2	a	b	b	a	1	b	b	b	c	b	b	b	b	a	c	30	180	t	t	t	n	n	t	t	n	t	t	n	a	a	a	a	a	a	a	1	1	1
226	34b	b	b	3	17.6806	1	b	a	a	a	1	b	b	b	c	a	b	a	c	a	a	60	120	t	t	n	t	t	t	t	n	t	t	n	a	a	a	a	a	a	a	1	1	1
227	35dg	a	b	1	16.375	1	a	b	b	a	1	b	c	b	b	b	b	c	c	b	a		120	t	n	n	n	n	n	n	n	t	t	n	b	a	a	a	a	a	a	1	1	1
228	36dg	a	b	1	17.3667	1	a	a	b	a	3	c	b	a	c	b	b	c	c	b	a	240	300	t	t	n	n	t	n	t	n	t	n	n	b	a	b	a	a	a	a	2	1	1
229	37dg	a	b	1	17.3667	1	a	a	b	a	3	c	b	a	c	b	c	c	c	a	b	180	420	t	t	n	n	t	n	t	n	t	n	n	b	a	a	a	a	a	a	2	1	1
230	38dg	b	b	1	16.7417	1	a	a	b	a	1	b	c	c	c	b	c	b	b	a	b	30	60	t	t	n	n	t	n	t	n	t	t	n	a	a	a	a	a	a	a	2	1	1
231	39dg	a	b	1	18.7611	2	b	b	b	b	0			c	c	a	a	c	c	b	b	90	30	t	n	n	n	n	n	t	n	t	n	n	a	a	a	a	a	a	a	1	1	1
232	42dg	b	b	2	17.6528	1	a	b	b	d	1	b	c	c	c	c	c	a	b	a	c	30	75	t	t	t	n	t	n	t	n	t	t	n	b	a	a	a	a	a	a	2	1	1
233	43dg	a	b	2	17.6694	1	a	b	b	a	1	d	d	c	c	a	a	a	c	a	a	180	480	t	n	n	n	n	n	t	n	t	n	t	b	a	a	a	a	a	a	2	1	1
234	45dg	a	a	2	14.9083	1	b	a	a	a	2	b	b	b	a	a	c	a	c	a	a	30		t	t	t	n	t	t	n	n	t	t	n	a	a	a	a	a	a	a	1	1	1
235	50dg	a	a	1	14.0806	1	a	b	a	a	1	c	b	b	b	b	b	b	b				150	t	n	n	n	n	t	t	n	t	n	n	a	a	a	a	a	a	a	1	1	1
236	44dg	b	b	2	20.6889	2	a	b	b	d	4	a	a	c	c	a	c	c	c	b	c	180	270	t	t	n	n	n	n	n	n	t	n	n	a	a	a	a	a	a	a	3	1	1
237	47dg	a	a	2	16.1167	1	a	b	b	a	1	c	c	a	a	a	b	a	b	a	a	30	60	n	t	n	n	n	n	n	n	t	n	n	a	a	a	a	a	a	a	1	1	1
238	48dg	b	a	3	16.7472	1	a	b	b	d	4	b	c	b	c	b	b	a	a	b	a	60	360	t	t	n	n	t	t	n	n	t	n	n	a	a	a	a	a	a	a	2	1	1
239	49dg	a	a	3	15.5889	1	a	b	b	a	1	c	b	b	c	b	a	b	b	b	b	180	120	t	t	t	t	t	t	t	n	t	t	n	a	a	a	a	a	a	a	1	1	1
240	51dg	a	a	3	15.5889	1	a	b	b	a	1	c	b	b	c	b	a	b	b	b	a	130	240	t	t	t	t	t	t	t	n	t	t	n	a	a	a	a	a	a	a	1	1	1
241	52dg	a	a	3	15.8194	1	a	b	b	a	1	c	c	c	c	a	a	b	b	b	a	180	600	t	t	t	t	t	t	t	n	t	t	t	a	a	a	a	a	a	a	1	1	1
242	53dg	a	a	3	15.1528	1	a	b	b					a	c	a	a	b	c	a	a	30	370	t	t	n	n	t	n	n	n	t	t	n	a	a	a	a	a	a	a	2	1	1
243	54dg	a	a	2	16.6528	1	a	b	b	a	1	c	d	b	a	a	b	a	b	b	a	60	120	t	t	n	n	n	n	t	n	t	t	n	a	a	a	a	a	a	a	1	1	1
244	55dg	a	a	2	16.8306	1	a	b	b	b	1	c	b	b	c	b	b	a	b	b	a	360	510	t	n	n	n	n	n	t	n	t	n	n	a	a	a	a	a	a	a	1	1	1
245	56dg	b	a	3	16.675	1	a	b	b	a	0	a	b	b	c	b	b	a	b	a	b	90	90	t	t	n	n	n	t	t	n	n	t	n	a	a	b	a	a	a	a		1	2
246	57dg	b	a	3	16.1278	1	a	b	b	a	3	a	a	a	c	a	b	a	c	a	a	0	90	t	n	t	n	n	n	t	n	t	n	n	a	a	b	a	a	a	a	1	1	1
247	58dg	a	a	1	14.3389	1	a	b	b	a	3			a	b	a	b	a	c	a	b	90	60	t	n	n	n	n	n	t	t	t	t	t	a	a	a	a	a	a	a	2	1	1
248	59dg	a	b	2	14.5694	1	a	b	b	a	3	a	a	c	c	a	c	a	c	a	c	90	120	n	n	n	n	n	n	t	t	t	n	t								1	3	2
249	60dg	a	b	1	13	1	b	b	b	a	1	b	a	a	a	a	a	b	c	a	b		60	t						t					a	b	a	b	c	a	b	2	2	2
250	61dg	b	b	5	24.7583	2	a	b	b	b	2	a	b	c	c	b	c	a	b	a	a	180	300	t	t	n	n	t	t	t	n	n	n	n	a	a	a	b	a	a	a	1	2	2
251	62dg	a	a	1	13.5333	1	a	b	a	a	2			b	a	a	c	a	c	a	a	0	90	t	n	n	n	n	n	n	n	n	t	n	a	a	a	a	a	a	a	1	1	1
252	63dg	a	a	1	14.3167	1	a	b	b	a	2	a	a	b	b	a	a	b	c	b	a	0	60	t	n	t	t	t	t	t	t	t	t	t	a	a	b	a	a	a	a	2	1	1
253	64dg	a	a	1	13.3111	1	b	a	b	c	1			b	b	a	b	a	c	a	a	60	90	t	t	n	n	t	t	n	n	t	t	n	a	a	a	a	a	a	a	1	1	1
254	65dg	b	a	3	17.075	1	a	b	a	a	5	c	c	c	c	b	c	b	b	a	a	60	240	t	t	t	n	t	t	t	n	t	n	t	b	b	a	a	a	a	a		2	2
255	66dg	a	b	2	14.0972	1	a	b	b	b	3	a	a	c	c	b	a	a	b	a	a	60	120	n	t	n	n	t	t	t	t	t	t	t	c	b	a	b	b	a	a		2	1
256	67dg	b	a	2	15.2306	1	a	b	b	b	4
257	70dg	a	a	1	13.2639	1	a	b	b	a	0	c	b	a	a	a	b	a	b	a	b	30	180	t	n	n	n	n	n	t	t	t	n	t	a	a	a	a	a	a	a	1	1	1
258	71dg	a	b	1	16.2056	1	a	b	b	a	1	b	c						b			60	30	t	n	n	n	n	n	n	n	t	n	n	a	a	a	a	a	a	a	2	1	1
259	1wa	b	b	4	20.6639	2	a	a	b	a	3	a	b	b	c	a	b	b	c	b	a	120	300	t	t	t	n	t	n	t	n	t	n	n	b	a	a	a	a	a	a	2	1	1
260	2wr	b	b	1	17.8194	1	a	a	b	a	2	b	b	a	b	a	b	b	c	a	a	0	60	n	n	t	n	t	n	t	n	n	n	n	a	a	a	a	a	a	a	1	1	1
261	3wr	a	b	3	19.3917	2	b	a	a	b	0	b		b	b	a	c	b	b	a	a	60	90	t	n	n	n	t	n	t	n	t	t	n			a	a	a	a	a	2	1	1
262	4w	b	a	1	14.2722	1	a	b	b	a	1	c	b	b	c	a	b	a	c	b	c	30	60	t	t	t	n	n	n	t	t	n	t	n	a	a	a	a	a	a	a	1	1	1
263	5w	b	a	1	13.85	1	a	b	b	a	1			c	c		c	b	b	a	b	90	90	t	t	t	t	t	n	t	n	n	t	n		b	a	a	a	a	a	2	3	1
264	6w	b	a	2	15.5417	1	a	b	b	d	2	b	b	b	c	a	c	b	c	b	a	0	90	t	t	n	n	n	t	t	n	t	t	n	a	a	a	a	a	a	a	2	2	2
265	7wr	a	b	3	16.7556	1	a	a	b	a	1	b	c	c	c	a	c	a	c	b	a	90	120	t	t	t	n	t	t	t	t	t	t	t	c	a	a	a	a	a	a		1	1
266	8wr	b	b	3	16.5528	1	a	b	b	b	4	b	c	c	c	b	c	b	c	a	c	180	360	t	t	n	n	n	t	t	n	t	t	n	b	a	a	a	a	a	a	2	2	2
267	9wr	a	b	2	19.9222	2	a	a	b	d	5			a	c	b	a	a	b	a	a		300	t	t	n	n	t	t	t	t	t	n	t	a	a	a	a	a	a	a	1	1	1
268	10wr	b	b	1	20.5722	2	a	a	b	c	3	b	c	a	b	a	b	a	c	a	a	0	90	t	n	n	n	t	n	t	n	t	t	n	a	a	a	a	a	a	a	1	1	1
269	11wr	b	b	3	19.9583	2	a	a	b	a	2			c	c	b	c	b	c	a	a			t	t	n	n	t	n	t	n	t	n	n	a	a	a	a	a	a	a	2	2	2
270	12wr	a	b	3	19.8583	2	b	a	b	a	3	b	c	b	c	b	c	b	c	a	b	30	90	t	t	n	n	t	n	t	n	t	t	n	a	a	b	a	a	a	a	3	2	1
271	13w	a	a	3	19.8583	2	b	a	b	a	1	a	b	a	c	b	c	b	b	a	a	30	90	t	t	n	t	t	n	t	t	t	t	t	c	a	c	b	c	b	c	2	1	2
272	14wr	b	b	1	17.5611	1	b	a	b	a	3	b	c	b	c	b	a	a	c	b	a	30	30	t	t	n	n	t	n	t	n	t	t	n	b	a	a	a	a	a	a	2	1	1
273	15wr	a	b	3	20.7889	2	a	a	a	b	3	c		c	b	a	c	b	c	a	a	90	120	t	n	n	n	t	n	n	n	t	n	n	a	a	a	a	a	a	a	2	2	1
274	16wr	a	b	2	18.3889	2	a	b	b	a	0	c	d	b	b	b	c	b	b	a	a	0	300	t	t	n	n	n	t	t	n	t	t	n	a	b	a	a	a	a	a	2	2	1
275	17wr	a	b	3	19.3472	2	a	b	b	a	1	c	b	a	a	c	c	a	b	a	a	150	120	t	t	t	t	n	t	t	t	t	t	t	b	b	b	b			a	2	2	1
276	18wr	b	b	1	21.0056	2	a	a	b	d	4	d	d	c	c	a	b	b	c	b	c	90	90	t	t	t	t	t	t	t	t	t	t	t	b	a	a	b	a	a	a	2	2	1
277	19wr	b	b	3	20.7	2	a	a	a	a	3	a	b	a	a	a	a	a	a	a	a	0	210	t	t	t	t	t	t	t	t	t	t	t	a	a	a	a	a	a	a	2	2	1
278	20w	a	a	1	13	1	b	a	b	a	4	c	d	b	b	b	a	b	b	a	b	0	60	t	n	n	t	t	t	t	n	t	t	n	a	a	c	a	a	a	b	2	1	1
279	21w	a	a	2	15.2556	1	a	a	b	a	8	c	c	a	a	a	b	b	a	a	a	0	0	t	n	n	n	n	t	t	n	t	t	t	a	a	a	c	a	a	c	1	1	1
280	22wr	a	b	3	20.4611	2	a	a	b	a	0	c	c	b	b	b	c	b	b	a	a	30	240	t	t	n	n	n	t	t	n	t	n	n	b	b	a	a		a	a	1	1	1
281	23w	b	a	1	14.3278	1	a	b	b	b	1	c	b	c	c	b	c	b	b	a	a	90	150	t	t	n	n	n	n	t	n	t	n	n	a	a	a	a	a	a	a	2	1	1
282	24wr	b	b	3	19.2694	2	a	b	b	a	1	c	b	c	c	c	b	c	c	a	a	30	60	t	t	n	n	n	t	t	n	t	n	n	a	a	a	a	a	a	a	1	1	1
283	25w	b	a	3	16.15	1	a	b	b	a	1	b	b	b	a	a	c	b	b	a	a	0	150	t	t	n	n	t	n	n	n	n	t	n	a	a	a	a	a	a	a	1	1	1
284	26w	b	a	3	16.2444	1	b	a	b	a	0			a	a	a	b	a	b	a	a	0	0	t	n	n	n	n	n	n	n	n	t	n	a	a	a	a	a	a	a	1	1	1
285	27w	b	a	3	15.825	1	a	a	b	b	2	b	a	b	c	a	b	b	b	b	a	600	60	t	t	n	n	n	n	t	n	t	t	n	b	a	a	b	a	b	a	2	2	2
286	28wr	b	b	1	18.075	2	a	a	b	b	2	b										90		t	n	n	n	t	n	t	n	t	t	n	a	a	a	a	a	a	a	2	1	1
287	29wr	a	b	1	19.925	2	a	b	b	b	1	c	a	c	c	b	c	b	c	b	a	420	540	t	t	t	n	t	n	t	n	t	t	n	c	a	a	a	b	c	a	2	2	1
288	30wr	b	b	3	23.1528	2	a	a	b	a	4	a	a	a	a	a	a	a	b	a	a	0	60	t	n	n	n	n	t	t	t	n	n	n	a	a	a	a	a	a	a	1	1	1
289	31wr	b	b	1	19.7694	2	b	a	b	b	1	b	c	b	c	a	a	a	b	a	a	0	270	t	n	n	n	t	n	t	n	t	t	n	a	a	a	a	a	a	a	2	1	1
290	32wr	b	b	2	19.8889	2	a	b	b	a	2	b	c	a	c	a	b	a	c	a	a	60	30	t	t	n	n	n	n	n	n	t	t	n	a	a	a	a	a	a	a	2	1	1
291	33wr	b	b	3	18.5444	2	a	a	b	a	3	d	b	b	c	c	b	a	b	a	b	90	180	t	t	n	n	t	t	n	n		t	n	a	a	a	a	a	a	a	1	1	1
292	34wr	b	b	3	20	2	a	a	a	b	3	b	c	b	c	a	b	a	b	a	a	90	90	t	t	n	n	t	n	t	n	t	t	n	b	a	a	a	a	a	a	1	1	1
293	35wr	a	b	3	20.7806	2	b	a	b	a	2	b	b	b	b	a	b	b	b	a	a	60	60	t	t	t	t	t	t	t	n	t	t	t	a	a	a	a	a	a	a		1	1
294	37wr	a	b	2	20.45	2	a	a	b	a	1	c	b	c	c	c	c	b	c	b	a	90	90	t	t	n	n	t	t	t	t	t	t	n	c	a	c	a	a	a	a	2	2	1
295	38wr	b	b	4	20.0944	2	b	a	b	a	1	b	b	a	a	b	b	b	c	b	a	0	90	t	t	n	n	t	t	t	n	t	t	n	b	a	a	a	a	a	a	2	1	1
296	39wr	a	b	3	20.55	2	b	a	b	b	2	b	b	b	c	a	c	b	c	b	b	180	300	t	t	t	t	t	t	t	n	t	t	n	b	a	a	a	a	a	a	2	2	2
297	40wr	a	b	2	22.8361	2	b	a	b	a	2	a	b	a	b	a	a	b	b	b	a	60	180	t	t	t	n	t	n	t	n	t	t	n	b	a	a	a	a	a	a		2	2
298	41wr	a	b	2	21.1972	2	a	b	b	a	0	b	b	b	a	a	c	a	b	a	a	30	120	t	t	n	t	t	t	t	t	t	t	t	b	a	a	a	a	a	a		1	1
299	42wr	b	b	1	15.7667	1	a	a	a	a	4	b	c	c	b	a	c	c	c	a	b	30	90	t	n	n	n	t	n	t	n	t	n	t	a	a	a	a	a	a	a	2	2	1
300	43wr	b	b	2	20.5639	2	a	a	b	a	1	d	d	b	c	b	b	a	c	a	a	0	240	t	t	n	n	t	n	t	n	t	n	n	a	a	a	a	a	a	a	1	1	1
301	44wr	b	b	2	23.4889	2	b	a	b	a	4	c	c	c	c	b	a	a	c	a	a	30	300	t	t	n	n	t	n	t	t	t	n	n	a	a	a	a	a	a	a	1	1	1
302	45wr	a	b	2	19.9472	2	b	a	b	a	1	b	c	b	c	a	b	b	c	a	b	0	180	t	t	n	n	t	t	t	n	t	t	n	a	a	a	a	a	a	a	1	1	1
303	46wr	b	b	2	22.0972	2	a	a	a	b	3	b		a	c	b	b	a	b	a	a	0	120	t	t	n	n	t	n	t	n	t	n	n	b	a	a	a	a	a	a	2	1	1
304	47w	b	a	3	16.2472	1	b	a	a	a	1	b	c	b	b	a	b	b	b	a	a	30	30	t	t	n	n	t	n	n	t	t	n	n	a	a	a	a	a	a	a	2	1	1
305	48wr	b	b	3	19.0528	2	b	a	a	b	1	b	b	b	c	b	c	b	c	a	a	150	210	t	t	t	n	t	t	t	t	t	t	n	a	a	a	a	a	a	a	2	1	2
306	49wr	a	b	4	19.6361	2	b	a	b	a	5	b	b	b	c	b	c	a	b	b	a	540	1440	t	t	t	n	t	t	t	n	t	t	n	a	b	b	a	a	a	a	2	1	2
307	50wr	b	b	3	20.075	2	a	a	b	a	2	b	b	c	c	a	b	a	b	b	a	120	300	t	t	t	n	t	t	t	n	t	t	n	a	a	a	a	a	a	a	2	1	2
308	51wr	b	b	1	18.6861	2	b	a	b	a	7	b	b	b	c	a	b	b	c	a	a	120	240	t	t	t	n	t	t	t	n	t	n	n	a	a	a	a	a	a	a	1	1	1
309	1L	a	a	1	14.0833	1	a	b	b	a	0	d	b	b	c	a	c	b	b	b	a	30	90	t	t	n	n	t	n	t	t	t	t	n	a	b	b	a	a	b	b		2	2
310	2L	a	a	1	14.4306	1	a	b	b	a	3	b	c	c	c	a	c	b	b	b	a	90	150	t	t	t	n	n	t	t	t	t	n	t	a	b	b	a	a	a	a	2	1	1
311	3L	b	a	1	13.5639	1	b	b	b	b	2	c	b	b	c	b	c	a	b	a	a	60	150	t	t	t	n	t	n	t	n	t	t	n	a	a	a	a	a	a	a	2	1	1
312	4L	b	a	1	13.1028	1	b	b	b	a	1	c	c	b	b	a	a	b	b	a	a	0	30	t	n	n	n	n	n	n	n	t	t	n	a	a	a	a	a	a	a	1	1	1
313	7L	a	a	3	15.2194	1	b	b	b	b	2	c	b	b	c	a	c	a	b	b	a	30	120	t	t	t	n	n	n	t	n	t	t	n	b	a	b	a	a	a	a	2	1	1
314	8L	a	a	3	18.8667	2	b	a	b	d	3	d		a	a	a	a	a	b	a	a	0	0	n	t	t	n	t	n	n	n	n	t	n	a	a	a	a	a	a	a	1	1	1
315	5L	a	a	1	13.6417	1	b	a	b	a	0	b	c	a	a	a	a	a	b	a	a	30	60	t	t	t	n	n	n	n	n	n	t	n	a	a	a	a	a	a	a	1	1	1
316	6L	a	a	2	15.7556	1	a	b	b	b	1	a	a	c	c	b	c	c	b	a	a	90	210	t	t	t	n	n	n	t	n	t	t	n	b	b	a	a	a	a	a	1	1	1
317	9L	b	a	1	13	1	b	a	b	a	1	a	c	b	b	a	b	b	b	a	a	0	30	t	n	n	n	n	n	t	n	t	t	n	a	a	a	a	a	a	a	1	1	1
318	10L	a	a	1	13.8583	1	a	b	b	a	2	b	d	c	c	a	c	a	c	a	a	30	90	t	t	t	n	t	t	t	n	t	n	n	a	a	a	a	a	a	a	2	1	2
319	11L	a	a	3	15.4222	1	a	b	a	a	1	d	d	a	a	a	a	a	c	a	a	240	420	t	t	n	n	n	n	t	t	t	n	t	a	a	a	a	a	a	a	2	1	1
320	12L	b	a	2	15.825	1	b	b	b	a	1			a	a	a	a	a	b	b	a		60	t	n	n	n	n	n	t	n	t	t	n	a	a	a	a	a	a	a	1	1	1
321	13L	a	a	3	15.6889	1	b	a	b	a	3			c	b	b	c	a	b	a	a	40	120	t	t	n	n	n	n	t	n	t	t	n	b	a	b	a	a	b	a	1	1	1
322	14L	b	a	3	16.0667	1	a	b	b	a	1	b	c	b	c	a	b	b	b	a	a	60	120	t	n	t	n	n	n	t	n	t	n	n	a	a	a	a	a	a	a	2	1	1
323	15L	a	b	2	17.9472	1	b	a	b	a	1	b	c	b	c	a	c	b	c	a	a	60	90	t	t	t	n	t	t	t	t	t	t	n	c	b	a	a	a	a	a	2	1	1
324	16L	a	b	2	18.3111	2	a	b	b	a	2	d	c	a	b	a	b	a	c	a	a	60	60	n	n	t	n	n	t	n	n	t	n	n	a	a	a	a	a	a	a	1	1	1
325	17L	b	b	1	17.3222	1	b	a	b	a	2	a	a	a	c	a	c	a	b	a	a	60	60	t	t	t	n	t	t	t	t	n	n	n	a	a	a	a	a	a	a	2	1	1
326	18L	b	b	1	17.575	1	b	a	a	a	4	b	c	a	a	a	a	a	c	a	a	30	0	n	t	t	n	t	n	n	n	n	t	n	a	a	a	a	a	a	a	1	1	1
327	19L	a	b	1	18.0889	2	b	a	a	c	1	b	c	a	a	a	a	a	b	a	a	60	0	n	t	t	n	t	n	n	n	t	t	n	b	a	a	b	a	a	b	1	1	1
328	20L	b	b	2	17.5056	1	a	a	b	a	1	c	b	c	c	a	c	b	c	a	b	300	960	t	t	t	t	t	t	t	n	t	t	n	b	a	a	a	a	b	a	2	1	1
329	21L	a	b	2	17.3944	1	b	a	b	a	0	b	c	b	b	a	b	a	b	a	a	30	60	t	n	n	n	n	n	t	n	t	n	n	a	a	a	a	a	a	a	1	1	1
330	22L	b	b	2	18.6194	2	b	a	a	a	2	b		a	b	a	b	a	b	a	a	30	30	t	t	t	n	t	n	n	n	t	t	n	a	a	a	a	a	a	a	1	1	1
331	23L	b	b	2	18.4889	2	b	a	a	a	2	a	b	c	c	a	b	c	c	a	a	0	90	t	t	n	n	t	t	n	n	t	n	n	a	a	a	a	a	a	a	3	1	1
332	24L	a	b	3	20.5167	2	a	b	b	a	1	c	b	b	b	b	c	a	b	a	a	0	60	t	n	t	t	n	n	n	n	t	t	n	a	a	a	a	a	a	a	2	1	1
333	26L	a	b	3	20.2111	2	a	a	b	b	1	c	b	c	c		c			c		60	300	t	t					t	t	t		t	a	a	a	a	a	a	a	1	1	1
334	27L	a	b	3	19.9278	2	a	a	b	a	1	c	d	c	c	c	c	c	c	c	c	120	600	t	t	t	n	n	t	t	t	t	t	t	c	c	c	c	c	c	c	3	3	3
335	28L	a	b	3	18.0667	2	b	a	b	a	1	d	b	b	c	b	b	b	c	b	a	15	300	t	t	t	t	t	t	t	n	t	t	n	a	a	a	a	a	a	a	2	1	1
336	29L	a	b	3	19.2556	2	a	a	b	d	1	b	c	b	a	c	c	c	b	a	c	120	480	t	t	n	n	n	t	n	n	t	n	n		a	a	a	a	a	a	3	3	2
337	30L	a	b	3	22.575	2	b	a	b	b	1	c	a	c	c	a	c	c	c	a	a	390	480	t	t	t	t	t	n	n	n	t	n	n	c	a	a	a	a	a	a	3	2	2
338	31L	a	b	3	20.5111	2	b	a	b	d	1	c	b	b	a	b	c	b	b	a	c	90	360	t	t	t	n	n	t	n	n	t	t	n	b	a	a	a	a	b	a	2	1	1
339	32L	a	b	1	20.3722	2	b	a	b	a	4	d	d	b	b	b	c	a	b	a	b	480	480	t	t	t	t	t	t	t	n	t	t	n	b	a	a	c	a	c	c	3	3	1
340	33L	b	b	1	19.9778	2	b	a	b	d	4	d		b	b	a	b	b	b	a	a	0	105	t	t	t	n	n	n	t	n	t	t	n	a	a	a	a	a	a	b	1	1	1
341	34L	a	b	3	22.4667	2	b	a	b	a	1	d	b	a	b	a	c	a	a	a	a	0	90	t	t	n	n	t	n	t	t	t	t	n	c	a	a	a	a	a	a	1	1	1
342	35L	b	b	1	16.9111	1	a	b	b	a	1	a	a	c	c	b	c	b	c	b	b	120	240	t	t	t	t	n	t	t	n	t	t	n	a	a	a	a	a	a	a	2	2	1
343	36L	a	b	1	17.1639	1	a	b	b	d	1	d	b	a	c	c	c	a	c	a	a	30	120	t	t	t	n	n	n	t	t	n	t	t
344	37L	a	b	2	19.0139	2	b	a	b	b	4	c	d	c	c	a	c	b	c	b	b	90	660	t	t	t	t	t	t	t	n	t	t	n	b	a	a	a	a	b	a	2	1	1
345	K101	a	a	1	13.3222	1	a	b	b	d	1	c	b	b	b	c	c	b	b	b	c		150	t	t	n	n	t		t	t	t	t	n	b	a	a	a	a	a	a	2	2	1
346	K101	a	a	1	13.3083	1	b	a	b	a	2	b	c	b	a	b	a	b	b	a	a	0	30	t	n	n	n	t	n	n	n	t	t	n	a	a	a	a	a	a	a	3	1	1
347	K101	a	a	1	14.4	1	b	a	b	a	1	c	b	c	c	b	b	b	a	b	b	90	240	t	t	n	t	t	t	t	t	t	t	t	a	a		b	a	a		2	1	1
348	K101	a	a	1	13.475	1	b	a	b	b	1	b	b	a	a	a	a	a	b	a	a	90	180	t	n	n	n	t	t	n	n	t	t	n	a	a	a	a	a	a	a	1	1	1
349	K101	a	a	1	13.5778	1	a	a	b	b	1	b		c	a	a	a	a	b	a	a	150	180	t	n	n	n	t	n	t	n	t	t	t	a	a	a	a	a	a	a	1	1	1
350	6Ł2	a	b	1	16.7222	1	b	a	b	b	2	c	b	c	c	b	c	b	b	a	a	0	60	t	n	n	t	t	t	t	n	t	t	n	a	b	a	a	a	a	a	1	1	1
351	8Ł2	a	a	1	16.6194	1	b	a	b	b	4			c	c	a	b	b	b	a	a	60	120	t	t	n	n	t	n	n	n	t	n	n	a	a	a	a	a	a	a		1	1
352	4Ł2	b	a	1	13.5639	1	a	b	b	b	2			a	c	a	a	a	c	a	a	60	120	t	t	n	n	t	t	t	n	t	n	n	a	a	a	a	a	a	a	1	1	1
353	1Ł2	a	a	2	17.2	1	a	a	b	a	3	c	d	b	c	a	b	a	c	b	a	20	150	t	n	n	n	n	n	t	t	t	n	n	a	a	a	a	a	a	a	1	1	1
354	3Ł2	b	a	1	15.2333	1	b	a	b	a	0			a	b	a	a	a	c	a	a	30	30	t	t	n	n	t		n	n	n	t	n	a	a	a	a	a	a	a	1	1	1
355	2Ł2	a	a	1	13.8194	1	a	b	b	a	1			a	a	a	b	a	c	a	a	30	90	t	n	n	n	n	t	t	t	t	n	t	a	a	b	a	a	a	a	1	1	1
356	B106	a	b	1	17.325	1	b	b	b	a	0			a	a	a	c	c	c	a	a	30	120	t	n	n	n	n	n	n	n	n	t	n	b	a	a	a	a	a	a	1	1	1
357	B104	b	a	1	14.8917	1	a	b	b	a	0			c	c	a	b	a	c	a	a	0	180	t	t	n	n	n	t	t	n	t	t	n	a	a	a	a	a	a	a	1	1	1
358	B102	a	a	1	13.1611	1	a	a	b	a	0			a	a	a	a	b	b	a	a	60	120	t	t	n	n	n	n	t	n	t	n	n	a	b	a	a	a	a	a	1	1	1
359	B101	a	b	3	18.2139	2	a	b	b	a	2	a	b	b	c	a	b	a	b	a	b	720	90	t	t	t	t	n	n	t	n	t	t	n	b	a	a	a	a	b	a	1	1	2
360	1OW	a	a	3	16.0861	1	a	a	a	a	1	d	b	c	b	c	c	c	c	b	b	150	420	t	n	t	n	t	n	t	n	t	n	n	c	a	a	a	a	a	a	1	1	1
361	2OW	a	a	3	15.4333	1	a	b	b	a	2	a	c	b	c	c	b	b	c	b	a	30	120	t	t	n	n	n	n	t	n	t	t	n	b	a	a	a	a	a	a	1	1	1
362	3OW	a	a	3	18.8944	2	b	a	b	a	5	b	b	b	c	a	c	b	b	b	a	30	180	t	t	n		t	n	n	n	t	t	n	b	a	a	a	a	a	a	2	2	2
363	4OW	a	a	3	16.4583	1	a	b	b	a	0	c	d	a	c	b	b	b		a	a	30	90	t	t	n	n	n	t	t	t	t	n	n	a	a	a	a	a	a	a	1	1	1
364	5OW	a	a	3	15.0972	1	b	a	b	a	3	d	c	b	b	a	c	a	b	a	a	90	210	n	n	n	n	t	n	t	n	t	n	t	c	c	c	a	a	a	a	2	1	1
365	6OW	b	a	3	15.5917	1	a	a	b	a	5	d	d	b	c	a	c	b	b	b	a	180	240	t	n	n	n	t	n	t	t	t	n	t	a	a	a	a	a	a	a	2	2	1
366	7OW	a	a	3	17.3889	1	b	a	b	b	1	d	d	a	c	a	b	a	b	a	a	30	90	t	t	n	n	t	n	t	n	t	t	t			a	a	a	a	a	2	2	1
367	8OW	b	a	3	15.0389	1	a	b	b	b	1	c		b	c	b	b	a	c	a	a	0	180	t	n	n	n	n	t	t	n	t	t	n	a	a	a	a	a	a	a		1	1
368	15OW	b	b	3	18.7139	2	a	a	b	a	1	b	c	b	c	a	b	a	b	a	a	0	180	t	t	n	n	t	n	t	n	n	t	n	a	a	a	a	a	a	a	2	1	1
369	16OW	a	b	1	22.4972	2	a	a	b	a	4	b	c	c	b	b	c	b	c	b	a	30	180	t	n	n	t	t	t	t	n	t	t	n	a	a	a	a	a	a	a	2	1	1
370	17OW	a	a	2	14.4694	1	b	a	a	a	1	b	b	c	c	b	b	c	b	a	a	120	180	t	t	n	n	t	n	t	n	t	n	n	a	a	a	a	a	a	a	2	1	1
371	18OW	b	b	2	20.2972	2	b	a	b	a	5	b	d	b	c	a	b	a	b	a	a	90	60	t	n	n	n	t	n	t	n	t	t	n	b	a	a	a	a	a	a	2	1	1
372	9OW	b	b	3	17.8889	1	a	a	b	a	4	b		b	c	a	b	b	c	a	b	120	120	t	n	n	n	t	t	t	t	n	t	n	b	a	a	a	a	a	a	1	1	1
373	10OW	b	b	3	18.3778	2	a	a	b	b	3	b	c	c	c	b	c	a	c	b	c	240	360	t	t	n	n	t	t	t	n	t	t	n	b	b	a	a	a	a	a	2	1	1
374	11OW	b	b	3	21.8139	2	b	a	b	a	4	a	a	b	b	a	b	b	b	a	a	120	180	t	n	n	n	t	n	t	n	n	t	n	a	a	a	a	a	a	a	2	1	1
375	12OW	b	b	3	18.5972	2	b	a	b	a	4	c	a	a	b	a	b	a	c	a	a	45	240	t	t	t	n	t	t	t	n	n	t	n	b	a	a	a	a	a	a	2	1	1
376	13OW	b	a	1	13.5389	1	a	b	a	a	2	d	d	a	a	a	c	b	b	b	a	0	30	t	n	n	n	n	t	t	n	t	n	n	a	a	a	a	a	a	a	1	1	1
377	14OW	a	b	1	19.3417	2	a	a	a	a	3	c	c	c	c	b	c	c	c	b	b	150	210	t	t	n	n	t	t	t	n	t	t	n	b	a	a	a	a	b	a	1	1	1
378	19OW	b	b	3	19.825	2	a	a	b	b	3	b	b	b	c	a	b	a	c	a	b	30	90	t	t	n	n	t	n	t	n	t	n	n	a	a	a	a	a	a	a	2	2	1
379	20OW	a	a	1	13.8056	1	a	a	a	b	2	c		b	c	b	c	c	c	a	c	45	420	t	t	n	n	t	t	t	n	t	t	n	c	a	c	a	a	a	a	2	1	1
380	21OW	b	b	3	17.9722	1	b	a	b	b	4	c		c	c	b	c	a	b	b	a	120	480	t	t	n	n	t	t	t	n	t	n	n	b	a	a	a	a	a	a	2	1	1
381	1ch	a	a	1	13.4889	1	b	a	b		4	c	b	b	b	b	b	a	b	a	a			t	t	n	n	t	n	t	t	n	t	n	a		a	a	a	a	a	2	1	1
382	2ch	a	a	1	15.2389	1	a		b	a	2	b	c	a	a	b	a	a	b	a	b	30	90	t	n	t	n	n	t	t	n	t	n	t	b	a	a	a	a	a	a		1	1
383	3ch	a	a	1	13	1	a		b		1	d	d	b	b	b	a	b	b	a	b	0	60	t	n	n	n	t	n	t	n	t	n	n	a	a	a	a	a	a	a		1	1
384	4ch	a	a	2	13.7417	1	a	a	b	a	1	c	d	b	c	b	c	b	b	b	a	75	270	t	t	n	n	t	n	t	t	t	t	t	c	a	b	a	a	b	a	2	1	1
385	5ch	a	a	2	14	1	a	a	b	b	2	c	b	b	c	a	a	a	b	a	a	0	75	t	t	n	n	t	n	t	n	t	t	n	a	a	a	a	a	a	a	2	2	1
386	6ch	a	a	2	14.9361	1	a	a	b	a	1	c	b	a	a	a	a	a	a	a	a	0	0	n	n	n	n	t	t	n	n	n	n	n	a	a	a	a	a	a	a	2	1	1
387	7ch	a	a	3	16.1639	1	a	b	b	d	3			b	b	a	c	b	b	a	a			t	t	n	n	n	n	t	n	t	t	n	a	a	a	a	a	b	a	2	1	1
388	8ch	b	a	3	16.3889	1	a	b	b	a	1	d	b									30	180	t	t	n	n	n	t	t	n	t	t	n	a	a	a	a	a	b	a	2	2	1
389	9ch	a	a	3	14.8917	1	a	b	b	b	1	c	d	b	a	a	b	a	b	a	a	0	270	t	n	n	n	n	n	n	n	t	t	n	a	a	a	a	a	a	a		3	1
390	10ch	a	a	3	15.5194	1	a	a	b	a	1	d	b	b	b	a	a	b	c	a	a	75	210	t	t	n	n	t	n	n	n	t	t	n	a	a	a	a	a	a	a	1	1	1
391	12ch	b	b	1	20.7944	2	a	a	b	d	6			c	c	a	b	b	c	a	a	90	120	t	t	t	n	t	n	t	n	t	n	n	a	a	a	a	a	a	a	2	1	1
392	13ch	a	b	1	17.0306	1	a	b	b	b	0	d	d	c	c	a	c	a	c	a	a	0	60	t	n	t	n	n	n	t	n	t	t	n	a	a	a	a	a	a	a	3	1	1
393	14ch	a	b	1	15.8056	1	a	b	b	a	1	c	b	b	b	a	b	b	c	a	b	0	30	t	n	n	n	n	n	t	n	t	n	n	a	a	a	a	a	a	a	1	1	1
394	16ch	b	b	1	21.5972	2	a	a	b	c	2	c	b	b	b	a	b	a	b	a	a	0	120	t	t	n	n	t	n	t	n	n	t	n	a	a	a	a	a	b	a	1	1
395	17ch	a	b	2	17.9917	1	b	a	b	a	2	a	a	a	a	a	b	a	b	a	a	60	90	t	t	n	t	t	n	t	n	t	t	n	a	a	a	a	a	b	a	1	1	1
396	18ch	a	b	2	19.6944	2	a	b	b	a	2	a	a	a	a	a	b	a	c	a	a	0	90	t	n	n	n	n	n	t	t	n	n	n	a	a	a	a	a	a	a	1	2	1
397	19ch	a	b	2	18.4972	2	a	b	b	a	2	c	c	b	c	a	b	a	b	a	a	60	240	t	n	t	n	n	t	t	n	n	n	t	a	a	a	a	a	b	b	1	1	1
398	20ch	a	b	2	17.8583	1	a	b	b	a	0	c	b	b	c	a	c	a	c	a	a	480	900	t	n	n	n	n	t	t	t	t		t	a	a	a	a	a	a	a	1	1	1
399	21ch	a	b	1	15.9528	1	a	a	b	a	2	d	d	b	b	a	a	a	b	a	a	60	180	t	t	n	n	t	n	t	n	t	n	t	a	a	a	a	a	b	a	2	1	1
400	22ch	b	b	1	17.0278	1	a	b	b	b	4	a		b	c	a	b	b	b	a	a	185	30	t	t	n	n	t	n	t	n	n	t	t	b	a	a	a	a	b	b	2	2	2
401	23ch	a	b	1	16.3139	1	a	b	b	b	1	a	b	c	b	b	a	b	b	b	a	60	270	t	n	n	n	n	n	t	n	t	n	n	b	a	c	a	a	a	a	2	1	1
402	24ch	a	b	2	19.1861	2	a	b	b	b	2	c		b	a	a	c	b	c	c	a	60	360	t	t	n	n	n	n	t	t	t	n	n	c	a	c	c	c	a	a	2	2	1
403	25ch	b	b	2	19.1889	2	a	b	b	b	2	c		b	a	a	c	b	c	c	a	30	360	t	t	n	n	n	n	t	t	t	n	n	c	a	c	c	c	a	a	2	2	1
404	26ch	b	b	2	21.3861	2	a	b	b	b	0	c	a	a	c	a	a	a	b	a	a	30	60	t	t	n	n	n	n	t	n	n	n	n	a	a	a	a	a	a	a	1	1	1
405	27ch	b	b	3	19.2	2	a	b	b	a	1	c	d									30	180	t	t	n	n	n	t	t	n	t	t	n	b	a	a	b	a	a	a	2	1	1
406	28ch	b	b	3	18.4528	2	b	a	b	a	0	b	c	c	c	b	b	b	c	a	a	90	180	t	t	n	n	t	n	t	n	t	t	n	b	a	a	a	a	a	a	2	2	1
407	29ch	a	b	3	20.4194	2	a	a	a	a	2	d	d	a	c	a	b	b	b	a	a	90	330	t	t	n	n	t	n	n	n	t	t	n	a	a	a	a	a	a	a	1	1	1
408	30ch	b	b	3	21.4111	2	a	b	b	b	1	d	d	a	b	a	a	b	b	a	a	120	240	t	t	n	n	n	n	n	n	t	n	n	a	a	a	a	a	a	a	1	1	1
409	31ch	b	b	3	17.8472	1	a	b	b	d	3	a	a	a	b	a	a	a	c	a	a	30	60	t	t	n	n	n	n	n	n	t	n	n	a	a	a	a	a	a	a	1	1	1
410	32ch	a	b	4	19.3944	2	b	a	a	b	3	c		b	b	c	c	c	c	a	b	120	240	t	t	n	n	t	t	t	n	t	t	n	b	a	a	a	a	a	a	2	1	1
411	33ch	b	b	4	20.1667	2	a	b	b	a	1	c	b	c	c	c	b	c	b	a	c	60	90	t	t	n	t	t	t	t	t	t	t	n	a	a	a	a	a	a	b	3	2	2
412	34ch	a	b	4	19.7361	2	a	b	b	a	1	d	b	c	c	a	c	c	c	b	a	30	60	t	t	t	t	t	t	t	n	t	t	n	b	a	a	a	a	a	a	2	1	1
413	35ch	a	b	4	19.0778	2	b	a	b					b	c	a	c	b	c	b	a	180	300	t	t	n	n	t	t	t	n	t	t	t	c	a	a	c	b	c	a	2	3	2
414	37ch	a	b	4	20.3583	2	a	b	b	b		b	b	b	b	b	b	b	b	b	b		150	t	t	t	t	t	t	t	n	t	t	n	b	a	a	a	a	a	a	2	2	1
415	38ch	b	b	1	16.4611	1	b	a	b	a	2	c	c	b	c	a	a	b	c	a	a	30	60	t	t	n	n	n	n	t	n	t	t	n	a	a	a	a	a	a	a	2	1	1
416	39ch	b	b	1	16.4778	1	a	a	b	a	0	b	d	a	b	a	b	b	c	b	a	60	60	t	t	n	n	t	n	t	n	t	n	n	a	a	a	a	a	a	a	1	1	1
417	40ch	b	b	1	16.3111	1	b	a	b	a	3	c	c	b	c	a	c	b	c	c	a	60	60	t	t	n	n	t	t	t	n	t	t	n	a	a	a	a	a	a	a	1	1	1
418	41ch	a	b	1	21.2861	2	a	b	a	d	3	c	b	b	b	b	c	a	c	a	b	30	90	t	t	n	n	n	n	n	n	t	t	n	a	a	a	a	a	a	a	1	1	1
419	42ch	a	b	1	16.0306	1	b	a	b	a	2	c	b	b	a	a	b	b	c	a	a	75	105	t	n	t	n	t	n	t	n	t	t	n	a	a	a	a	a	a	a	2	1	1
420	43ch	a	b	1	17.0111	1	a	a	b	a	2	c	b	c	b	a	a	a	b	a	a	300	660	t	t	n	n	t	n	t	n	t	n	t	a	a	a	a	a	a	a		1	1
421	44ch	b	b	2	16.9167	1	b	a	b	a	2	c	c	b	c	a	b	b	c	b	a	30	90	t	t	n	n	t	n	t	n	t	n	n	a	a	a	a	a	a	a	2	2	1
422	45ch	a	b	2	19.3667	2	a	b	b	a	10	b	b	c	c	a	a	a	a	a	a	0	120	t	n	n	n	n	n	t	n	n	t	n	a	a
423	46ch	a	b	2	17.5417	1	a	b	b	a	2	d	d	c	c	a	c	b	b	a	a	90	120	t	n	n	t	n	t	t	n	t	t	t	c	a	b	a	a	a	a	1	1	1
424	47ch	a	b	2	17.3944	1	a	a	b	b	1	c	c									90	60	t	t	n	n	t	n	t	n	t	n	n	a	a	a	a	a	a	a	1	1	1
425	48ch	a	b	2	20.3111	2	a	b	b	a	1	b	a	a	b	a	b	b	c	a	a	0	60	t	n	n	n	n	n	t	t	t	t	n	b	a	a	a	a	b	a	2	1	1
426	49ch	b	b	2	17.4611	1	b	a	b	a	3	b	c	a	c	b	c	b	b	b	b	90	90	t	t	n	n	t	t	t	n	t	t	n	c	a	a	a	a	a	a	2	1	1
427	50ch	b	b	2	18.1611	2	a	b	b	a	1	b	c	b	c	a	a	a	b	a	b	30	60	t	n	n	n	n	t	t	n	n	t	n	a	a	a	b	a	a	a	2	1	1
428	51ch	b	b	3	17.9056	1	a	a	b	a	0	d	d									0	240	t	t	n	n	n	n	t	n	t	t	n	a	c	a	c	a	a	a	3	2	2
429	52ch	b	b	3	18.0917	2	a	a	b	b	1	d		b	c	a	a	a	c	a	a	30	840	t	t	n	n	t	t	t	n	t	t	n	a	a	a	a	a	a	a	2	1	1
430	53ch	b	b	3	18.1778	2	b	a	b	a	3	b	c	b	c	a	b	c	c	a	a	0	20	t	n	n	n	n	n	t	n	n	t	n	a	a	a	a	a	a	a	2	1	1
431	54ch	b	b	4	21.3139	2	a	b	b	b	1	c		c	b	b	c	c	c	c	c	180	240	t	t	n	n	n	t	t	n	t	t	n	a	a	a	a	a	b	a	1	1	1
432	55ch	a	b	4	18.95	2	a	b	b	a	1	d	d	c	c	a	c	a	b	c	a	0	240	t	n	n	n	n	t	t	n	t	t	t	b	c	c		c	c	c	3	2	2
433	56ch	b	b	4	20.4083	2	b	a	b	a	3	c	b	b	b	a	a	b	c	b	a	120	30	t	t	n	n	t	n	t	n	t	t	n	a	a	a	a	a	a	a	1	1	1
434	57ch	b	b	4	20.4139	2	b	a	b	a	4	c	a	b	b	a	a	b	c	a	a	30	60	t	n	n	n	t	t	t	n	n	t	n	a	a	a	a	a	a	a	1	1	1
435	58ch	a	b	4	19.7389	2	a	a	b	c	2	c	a	b	b	a	a	b	b	b	a	60	240	t	t	n	n	t	n	t	n	t	t	n	a	a	a	a	a	c	a	1	1	1
436	59ch	a	b	3	18.3556	2	a	a	b	a	1	c	c	b	b	a	b	b	c	a	a	90	300	t	t	n	t	t	t	t	n	t	t	n	b	a	a	a	a	a	a	1	1	1
437	60ch	a	b	1	19.8361	2	a	a	b	b	1	b		b	c	a	a	c	b	a	a	30	90	t	t	n	n	t	n	t	n	t	t	n	a	a	a	a	a	b	a	2	2	1
438	1wa	a	a	1	14.4222	1	a	b	b	a	1			a	a	a	a	a	b	a	a			t	t	t	n	n	n	t	n	t	n	n		a	a	a	a	a	a	1	1	1
439	2wa	b	a	1	13.725	1	a	b	b	a	1	d	d	a	a	a	c	b	b	a	a	0	120	t	n	n	n	n	n	t	n	n	n	n	a	a	a	a	a	a	a	1	1	1
440	3wa	b	a	1	13	1	a	a	b	b	2	d	d		c	a	c	b	c	a	a	0	60	t	t	n	n	t	n	t	n	n	t	n	a	a	a	a	a	a	a	1	1	1
441	4wa	b	a	1	14.2167	1	a	b	b	a	2	a	a	a	a	a	a	a	a	c	a	0	60	t	t	t	t	n	n	t	t	n	t	n	a	a	a	a	a	a	a	1	1	1
442	5wa	b	a	1	14.2028	1	a	b	b	a	0	a	a	a	a	a	b	a	a	a	a	0	0	n	t	t	t	t	n	n	n	n	n	n	a	a	a	a	a	a	a	1	1	1
443	6wa	a	a	2	14.1806	1	a	b	a	b	3	d	d	b	b	a	a	b	b	a	a	0	30	t	n	n	n	n	n	t	n	t	t	n	a	a	a	a	a	a	a	2	2	1
444	8wa	b	a	2	13.9889	1	b	b	b	a	2	d	d	a	b	b	b	a	b	b	b	90	180	t	t	t	n	n	t	t	t	t	t	t	a	a	a	b	a	a	a	3	3	2
445	9wa	b	a	2	14.4111	1	b	a	b	a	2			c	c	a	a	a	c	a	a	300	720	t	t	t	t	t	t	t	n	t	t	n	a	a	b	a	a	a	a	2	1	1
446	10wa	a	a	2	17.9389	1	a	b	b	a	2	c	b	b	c	a	b	a	b	b	a	60	210	t	t	n	n	n	n	t	n	t	n	n	a	a	a	a	a	b	a	1	1	1
447	11wa	b	a	2	14.3417	1	a	b	b	c	0	d	d	a	b	b	c			b	a			t	t	t	n	n	t	n	n	t	t	n					b	b
448	12wa	a	a	2	15.3639	1	b	a	b	a	1	c	c	c	c	b	c	b	b	b	a	90	60	t	t	t	t	t	t	t	t	t	t	t	a	a	a	a	a	b	a	2	2	2
449	13wa	a	a	2	14.3833	1	a	a	b	b	0	c		b	c	a	c	a	a	a	a	300	120	t	n	n	n	t	n	t	n	t	n	n	a	a		a	a	a	a	3	2	1
450	14wa	a	a	1	14.8889	1	b	b	a	a	0	c										30	30	t	t	n	n	n	n	t	n	t	t	n	a	a	a	a	a	a	a	1	1	1
451	15wa	b	a	3	14.9611	1	a	a	b	d	2	b	b	b	c	a	b	b	b	a	b	30	180	t	n	n	t	t	t	t	n	t	t	n	a	a	a	a	a	a	a	1	1	1
452	16wa	a	a	3	15.3639	1	b	a	b	a	2			b	c	a	b	a	b	a	a	60	60	t	n	n	n	t	n	t	t	t	n	t	b	a	a	a	a	b	a	2	1	1
453	17wa	b	a	3	15.5917	1	b	a	b	a	1	c	b	a	a	a	b	a	c	b	a	30	90	t	t	t	n	t	n	n	n	t	t	n	a	a	a	a	a	a	a	1	1	1
454	18wa	b	a	3	16.5	1	b	a	b	b	1	b	c	b	c	a	b	a	c	a	b	180		t	t	n	t	t	t	t	n	t	t	n	a	a	a	a	a	a	a	2	2	2
455	19wa	b	a	3	16.0028	1	a	b	b	b	2			c	c	b	b	a	b	b	a	60	180	t	n	n	n	n	t	t	n	t	n	n	c	a	a	c	a	a	a	2	1	1
456	20wa	a	a	3	16.4667	1	a	b	b	a	0	d	d	c	c	a	b	a	b	a	a	60	180	t	n	n	n	n	n	t	n	t	n	t	c	a	b	c	a	a	b	2	2	1
457	22wa	a	b	1	18.1444	2	a	b	b	d	1	c	b	b	c	a	c	b	b	a	a	180	300	t	t	t	n	n	n	t	n	t	n	n	a	a	a	a	a	a	a	2	1	1
458	24wa	b	b	1	16.3194	1	a	b	b	a	1			a	b	a	b	b	c	b	a	240	480	t	n	n	n	n	t	t	n	t	n	n	a	a	a	a	a	a	a	1	1	1
459	25wa	b	b	1	16.1722	1	a	a	b	a	1	c	d	a	c	a	c	a	c	a	a	90	90	t	t	n	n	t	t	t	n	t	n	t	a	a	a	a	a	a	a	1	1	1
460	27wa	b	b	1	19.2056	2	b	a	b	a	2	d	d	b	c	a	a	b	c	a	a	0	60	t	t	n	n	n	n	t	n	n	t	n	a	a	a	a	a	a	a	2	2	1
461	28wa	b	b	3	17.9972	2	a	b	a	a	0	c	c	b	b	a	c	c	b	a	a	60	60	t	n	t	t	t	n	t	n	t	n	n	a	a	a	a	a	a	a	1	1	1
462	29wa	b	b	3	19.6722	2	a	a	b	b	0	a	a	b	c	b	c	b	c	b	b	60	600	t	t	n	n	t	n	t	n	t	t	n	c	a	a	a	a	a	a	2	2	2
463	30wa	a	b	3	18.9861	2	a	b	b	a	1	c	b	b	c	b	c	b	b	a	a	180	180	t	n	n	n	n	n	t	t	t	n	t	a	a	a	a	a	a	b	2	1	1
464	31wa	b	b	3	18.0889	2	a	b	b	a	1	d	d	c	c	b	b	b	a	b	b	60	120	t	t	t	n	t	t	t	n	t	t	n	b	a	a	a	a	a	a	2	2	1
465	32wa	a	b	3	17.8528	1	a	b	b	b	0	d	b	c	c	a	b	c	c	a	b	0	270	t	t	t	n	t	n	t	n	t	t	n	c	c	b	a	b	c	a	2	1	1
466	33wa	a	b	3	20.1083	2	a	b	b	b	0			a	b	b	b	b	b	a	a	180	300	t	n	n	n	n	n	t	n	t	t	n	a	a	a	a	a	a	a	1	1	1
467	34wa	b	b	3	18.4306	2	a	a	b	a	3	d	c	b	c	b	b	b	b	a	b	30	60	t	t	n	n	t	n	n	n	t	t	n	a	a	a	a	a	a	a	2	1	1
468	35wa	a	b	3	18.3639	2	b	a	b	a	1	d	c	b	a	b	a	b	c	a	b	120	150	t	n	n	n	n	n	t	t	t	n	n	a	a	a	a	a	a	a	1	1	1
469	36wa	b	b	3	18.3917	2	b	a	b	a	3			a	b	a	b	c	c	b	a	300	240	t	n	n	n	n	n	n	n	t	t	n	a	a	a	a	a	a	a	1	1	1
470	37wa	b	b	3	21.6139	2	a	b	b	d	0	d		a	c	a	b	c	c	b	a	60	270	t	t	n	n	n	n	t	n	t	t	n	a	a	a	a	a	a	a	2	1	1
471	38wa	a	b	1	18.8611	2	a	b	b	a	1	d	d	a	a	a	b	a	a	a	a		120	t	n	n	n	n	t	t	t	t	n	t	a	a	a	a	a	a	a	1	1	1
472	39wa	b	b	1	18.7806	2	b	a	b	a	1				c		c					60		t				t			t											1	1	1
473	40wa	b	b	1	17.8833	1	a	b	b	b	2	d		a	b	a	a	a	b	a	a			t	n	n	n	n	n	n	n	t	n	n	a	a	a	a	a	a	a	1	1	1
474	41wa	b	b	1	17.3417	1	a	b	b	b	1	b	b	a	a	a	a	a	a	b	a	30	90	t	n	t	n	n	n	t	t	n	n	n		c	a	a	a	a	b	2	1	1
475	42wa	b	b	2	15.8833	1	b	a	b	d	0	c		a	a	a	a	a	c	a	a		30	n	t	t	t	t	t	n	n	t	t	n	a	a	a	a	a	a	a	1	1	1
476	44wa	b	b	2	17.9778	1	a	b	b	d	3	d		b	c	a	c	b	c	a	b	60	90	t	t	n	n	n	t	t	n	t	t	n	a	a	a	a	a	a	a	2	1	1
477	45wa	a	b	2	17.7222	1	a	b	b	a	2	a	b	b	c	b	b	b	a	a	a	120	300	t	t	n	n	n	t	t	n	t	n	n	b	a	a	a	a	a	b	2	2	1
478	46wa	a	b	2	16.9361	1	b	a	b	a		b	d	c	c	b	c	a	b	a	a	60	330	t	t	t	n	t	t	t	n	t	t	n	c	c	b	a	b	b	b	1	1	1
479	47wa	b	b	1	18.5194	2	a	b	b	a		c	c	a	a	a	a	a	a	a	a			t	n	n	n	n	n	n	n	t	n	n	a	a	a	a	a	a	a	1	1	1
480	48wa	a	b	2	16.35	1	a	b	b	a	1	c	b	a	c	a	c	a	b	b	a	60	180	t	t	n	n	n	t	t	n	n	n	t	b	a	a	b	a	a	a	2	1	3
481	49wa	b	b	3	22.3972	2	a	b	a	a	4	d	d	a	c	a	a	a	a	a	a	90	60	t	t	n	t	t	t	t	n	t	t	n	b	b	b	b	b	b	b	2	1	1
482	50wa	a	b	3	18.8917	2	a	b	b	a	0	d	d	b	b	b	b	b	b	b	b	90	150	t	t	t	t	t	t	t	t	t	t	t	a	a	a	a	a	a	a		1	1
483	51wa	a	b	3	20.8806	2	a	b	b	a	1	c	a	b	c	a	c	a	c	a	a	60	90	t	t	t	t	n	n	n	n	t	n	n	a	a	a	a	a	a	a	1	1	1
484	52wa	b	b	3	19.3083	2	a	b	b	a	1			c	c	a	b	b	b	a	a	60	90	t	t	t	t	n	t	t	n	t	t	n	a	a	b	a	b	a		3	2	1
485	53wa	b	a	1	15.4889	1	a	b	b	a	1	d	b	a	a	a	a	a	b	a	a	0	20	t	t	t	t	n	t	n	n	n	t	n	a	a	a	a	a	a	a	2	1	1
486	KN1	a	a	1	13.4361	1	b	a	a	a	1	a	b	b	b	b	b	c	a	a	b	60	368	t	n	t	n	n	n	n	n	n	n	n	a	a	a	a	a	a	a	1	1	1
487	KN2	a	a	1	13.4667	1	b	a	a	a	1			c	b	b	b	b	b	b	b	90	378	t	t	n	n	t	t	t	n	t	t	t	a	a	b	a	a	a	b	1
488	KN3	a	a	1	13.4417	1	b	b	a	c	1	a		b	a	a	b	a	b	a	a	60	30	t	n	n	n	t	n	n	n	t	n	n	a	a	a	a	a	a	a	1	1	1
489	KN4	b	a	1	13.725	1	a	a	a	a	1	c		a	a	a	a	a	a	a	a	0	0	n	n	n	n	n	n	n	n	n	n	n	a	a	a	a	a	a	a	1
490	KN5	b	b	1	16.7667	1	a	a	a	b	1	a	a	b	b	a	c	b	c	a	b	30	120	t	t	n	t	n		n	n	t	n	n	b	a	a	a	a	a	a	2	1	1
