# Supplementary material for: Internet risky behaviours among youth with visual impairment
Source: PeerJ journal article supplement (doi:10.7717/peerj.12376), 2021-11-30
Supplement: survey,_english.docx [file survey%2C_english.docx]

**Questionnaire**

Employees of the Medical University of Lodz with the participation of the Fund for Solving Gambling Problems implement the project: "Assessment of knowledge, attitudes and skills in the use of new media and gambling in junior high school and high school students with visual impairment from special institutions. The survey consists of two parts. The first part of the questionnaire concerns sociodemographic, including: age, gender, type of school, place of residence, your academic performance, relationships with relatives and the economic and social situation in your family home.

The second part of the survey assesses your knowledge, attitudes and behavior regarding your use of the Internet, computer games, mobile phones and gambling.

We remind you that the research is conducted anonymously. The obtained information will be aggregated statistically analyzed, used for research purposes, and individual results will not be disclosed to teachers or parents.

The questionnaire will be read by the person responsible for conducting this survey. Please write your answers on the prepared answer sheets. We kindly ask you to participate in this study and answer the question closest to you. After completing the survey, please put it in the enclosed envelope, seal it and return it to the person responsible for conducting the research.

Code of participant:

**Sociodemographic variables:**

1. Sex
2. male
3. female
4. **Type of school:**
5. low- secondary
6. up-secondary
7. **Class level:**
8. **Date of your birthday:**
9. **Place of living**
10. Urban
11. No urban
12. **Boarding school:**
13. Yes
14. No
15. **Type of visual impairment**
16. Bind
17. Poor-sighted
18. **Do you live?**
19. living with 2 parents
20. living only with mother
21. living only with father
22. other family situation
23. **How many siblings do you have?………**
24. **Mother’s education level**
25. primary school
26. vocational education
27. secondary education
28. higher education
29. **Father’s education level**
30. primary school
31. vocational education
32. secondary education
33. higher education

**The questionnaires regarding internet behaviors**

1. **The aim of internet using: a- never/almost never; b - sometimes; c - never/almaost never**
2. Conversation via the Internet (chats, Skype)
3. SNS
4. Discussion forums
5. MP3, music and software uploading
6. e-mails
7. Searching for information for learning purpose
8. Blogs
9. **How many hours do you spend using internet?**

During school days……..

During free days………….

1. **What place do you choose for using internet? Please choose yes/no**
2. Home
3. School
4. Library
5. Internet caffe
6. Boarding school
7. **Do you use the following staff for surfing? Please choose yes/no**
8. TV
9. the own computer
10. computer shared with other members of your family
11. console
12. **Have mentioned situations ever happened you? Please indicate: a- never/almost never; b - sometimes; c - never/almost never**
13. Downloading the software illegally without valid license
14. Publication of photos and movies on YouTube without permission of their owners
15. Hacking
16. Communication with persons promoting violence
17. Viewing sexual pages online
18. Gambling on-line
19. **Have you ever witnessed someone threatening or offending other people via the Internet?** Please indicate: a- never/almost never; b - sometimes; c - never/almost never
20. **Have you ever been threatened or offended by another person via the Internet?** Please indicate: a- never/almost never; b - sometimes; c - never/almost never
21. **Have you ever threatened or offended another person via the Internet?** Please indicate: a- never/almost never; b - sometimes; c - never/almost never
